# Supplementary material
Source: PubMed Central journal article supplement (PMC518763)
Supplement: pnas_101_38_13826__1.pdf [file pnas_101_38_13826__1.pdf]

**Table 2: Distribution of the 27 kb plasmid among pathogenic *Yersinia***

| <i>Y. pseudotuberculosis</i><br>(50 strains) | Origin     | Country     | Biotype | Serotype | P126 | P127 | P128* | P129* | P130* |
|----------------------------------------------|------------|-------------|---------|----------|------|------|-------|-------|-------|
| IP32953                                      | Human      | France      | NA      | I        | +    | +    | +     | +     | +     |
| IP32790                                      | Pig        | Italia      | NA      | I        | -    | -    |       |       |       |
| IP32954                                      | Human      | France      | NA      | I        | -    | -    |       |       |       |
| IP32637                                      | Unknown    | France      | NA      | I        | -    | -    |       |       |       |
| IP32950                                      | Human      | France      | NA      | I        | -    | -    |       |       |       |
| IP32929                                      | Hare       | France      | NA      | II       | -    | -    |       |       |       |
| IP32934                                      | Monkey     | France      | NA      | II       | -    | -    |       |       |       |
| IP32951                                      | Human      | France      | NA      | II       | -    | -    |       |       |       |
| IP32921                                      | Hare       | France      | NA      | II       | -    | -    |       |       |       |
| IP32937                                      | Bovine     | Argentina   | NA      | III      | -    | -    |       |       |       |
| IP32938                                      | Bovine     | Argentina   | NA      | III      | -    | -    |       |       |       |
| IP32509                                      | Unknown    | Spain       | NA      | IV       | -    | -    |       |       |       |
| IP31411                                      | Hare       | Denmark     | NA      | IV       | -    | -    |       |       |       |
| IP32816                                      | Hare       | Japan       | NA      | V        | -    | -    |       |       |       |
| IP32817                                      | Hare       | Japan       | NA      | V        | -    | -    |       |       |       |
| IP32821                                      | Human      | France      | NA      | V        | -    | -    |       |       |       |
| IP31553                                      | Guinea-pig | Japan       | NA      | VI       | -    | -    |       |       |       |
| IP32949                                      | Human      | France      | NA      | I        | -    | -    |       |       |       |
| IP32889                                      | Unknown    | Spain       | NA      | III      | +    | -    | -     | +     | +     |
| IP31833                                      | Sheep      | England     | NA      | IV       | -    | -    |       |       |       |
| IP32952                                      | Human      | France      | NA      | V        | -    | -    |       |       |       |
| IP30151                                      | Otter      | Sweden      | NA      | IV       | -    | -    |       |       |       |
| IP30215                                      | Guinea pig | Danemark    | NA      | II       | -    | -    |       |       |       |
| IP30284                                      | Pigeon     | Italy       | NA      | I        | -    | -    |       |       |       |
| IP30437                                      | Beaver     | Canada      | NA      | I        | -    | -    |       |       |       |
| IP30642                                      | Mouse      | Tunisia     | NA      | I        | -    | -    |       |       |       |
| IP30911                                      | Hare       | Holland     | NA      | II       | -    | -    |       |       |       |
| IP31554                                      | Guinea pig | Japan       | NA      | VI       | -    | -    |       |       |       |
| IP31878                                      | Rodent     | Tunisia     | NA      | I        | -    | -    |       |       |       |
| IP32323                                      | Water      | Norway      | NA      | II       | -    | -    |       |       |       |
| IP32463                                      | Guinea pig | Switzerland | NA      | V        | -    | -    |       |       |       |
| IP32533                                      | Deer       | New Zealand | NA      | I        | -    | -    |       |       |       |
| IP32581                                      | Human      | Belgium     | NA      | II       | -    | -    |       |       |       |
| IP32665                                      | Hare       | Yougoslavia | NA      | I        | -    | -    |       |       |       |
| IP32802                                      | Pig        | Italy       | NA      | III      | -    | -    |       |       |       |
| IP32939                                      | Soil       | Romania     | NA      | I        | -    | -    |       |       |       |
| IP32984                                      | Human      | Spain       | NA      | III      | -    | -    |       |       |       |
| IP32992                                      | Bovine     | Australia   | NA      | III      | -    | -    |       |       |       |
| IP33005                                      | Monkey     | Germany     | NA      | I        | +    | +    | +     | +     | +     |
| IP33012                                      | Monkey     | Germany     | NA      | II       | -    | -    |       |       |       |
| IP33023                                      | Monkey     | Switzerland | NA      | II       | -    | -    |       |       |       |
| IP33038                                      | Marsupial  | Australia   | NA      | I        | -    | -    |       |       |       |
| IP33051                                      | Caprine    | France      | NA      | III      | -    | -    |       |       |       |
| IP33054                                      | Human      | Sapin       | NA      | II       | -    | -    |       |       |       |
| IP33061                                      | Monkey     | Germany     | NA      | V        | -    | -    |       |       |       |
| IP33088                                      | Human      | France      | NA      | II       | -    | -    |       |       |       |
| IP33097                                      | Deer       | Argentina   | NA      | III      | -    | -    |       |       |       |
| IP33098                                      | Hare       | France      | NA      | II       | -    | -    |       |       |       |
| IP33105                                      | Bovine     | Argentina   | NA      | III      | -    | -    |       |       |       |
| IP33108                                      | Human      | Bulgaria    | NA      | III      | -    | -    |       |       |       |
| IP33109                                      | Human      | France      | NA      | I        | -    | -    |       |       |       |

| <i>Y. pestis</i> (15 strains)         | Origin     | Country       | Biotype | Serotype    | P126 | P127 | P128* | P129* | P130* |
|---------------------------------------|------------|---------------|---------|-------------|------|------|-------|-------|-------|
| 564                                   | Rodent     | Kurdistan     | M       | NA          | -    | -    |       |       |       |
| 613                                   | Unknown    | Burma         | O       | NA          | -    | -    |       |       |       |
| 554                                   | Human      | Kenya         | A       | NA          | -    | -    |       |       |       |
| 544                                   | Human      | Kenya         | A       | NA          | -    | -    |       |       |       |
| 549                                   | Human      | Belgium Congo | A       | NA          | -    | -    |       |       |       |
| 520                                   | Rodent     | Kurdistan     | M       | NA          | -    | -    |       |       |       |
| 665                                   | Human      | Madagascar    | O       | NA          | -    | -    |       |       |       |
| 1273                                  | Human      | Vietnam       | O       | NA          | -    | -    |       |       |       |
| 1222                                  | Human      | Vietnam       | O       | NA          | -    | -    |       |       |       |
| 507                                   | Unknown    | Vietnam       | O       | NA          | -    | -    |       |       |       |
| 1053                                  | Human      | Vietnam       | O       | NA          | -    | -    |       |       |       |
| 663                                   | Human      | Madagascar    | O       | NA          | -    | -    |       |       |       |
| 249                                   | Human      | Madagascar    | O       | NA          | -    | -    |       |       |       |
| 570                                   | Rodent     | Brazil        | O       | NA          | -    | -    |       |       |       |
| 501                                   | Unknown    | Germany       | O       | NA          | -    | -    |       |       |       |
| <i>Y. enterocolitica</i> (15 strains) | Origin     | Country       | Biotype | Serotype    | P126 | P127 | P128* | P129* | P130* |
| IP21591                               | Food       | Australia     | 1       | O:5         | -    | -    |       |       |       |
| IP21642                               | Human      | France        | 1       | O:5         | -    | -    |       |       |       |
| IP66                                  | Chinchilla | Switzerland   | 3       | O:1,2a,3    | -    | -    |       |       |       |
| IP69                                  | Chinchilla | Switzerland   | 3       | O:1,2a,3    | -    | -    |       |       |       |
| IP3                                   | Hare       | France        | 5       | O:2a,2b,3   | -    | -    |       |       |       |
| IP21461                               | Human      | France        | 2       | O:9         | -    | -    |       |       |       |
| IP21412                               | Food       | Argentina     | 2       | O:9         | -    | -    |       |       |       |
| IP22274                               | Human      | Australia     | 4       | O:3         | -    | -    |       |       |       |
| IP21699                               | Human      | France        | 4       | O:3         | -    | -    |       |       |       |
| IP845                                 | Human      | U.S.A.        | 1B      | O:20        | -    | -    |       |       |       |
| IP21605                               | Food       | Australia     | 1A      | O:7,13      | -    | -    |       |       |       |
| IP21440                               | Food       | France        | 1A      | O:7,8,19    | -    | -    |       |       |       |
| IP21389                               | Food       | France        | 1A      | O:7,8,13,19 | -    | -    |       |       |       |
| IP21373                               | Food       | France        | 1A      | O:6,31      | -    | -    |       |       |       |
| IP21633                               | Food       | France        | 1A      | O:10,34     | -    | -    |       |       |       |

\*Primers were only tested in the 3 *Y. pseudotuberculosis* strains  
NA: Not applicable

#### Primer Sequences

|      |   |                       |
|------|---|-----------------------|
| P126 | F | ATAAGCTGGCTGGCAAATATG |
|      | R | GAAGGTCAGACGGTGACTGAG |
| P127 | F | AATAATCACCTCTAGGAGG   |
|      | R | TCTTCTTTGTCACTAGGGTT  |
| P128 | F | ATGTTAGCGCCAGAATTGGA  |
|      | R | GTACGCCTTTATCACGTGCC  |
| P129 | F | ATGAGTGCTATTCTCTCGGA  |
|      | R | ACATGCGCCTCGCCTATTAG  |
| P130 | F | CGCCAAGAAAATCCCCTTGG  |
|      | R | ATGAGGTATCTGTAAGTTGG  |
