# Supplementary material
Source: PubMed Central journal article supplement (PMC518763)
Supplement: pnas_101_38_13826__2.pdf [file pnas_101_38_13826__2.pdf]

Table 3: Regions and genes (or domains of functional genes) specific to IP32953, in comparisons with CO92 and KIM10+

| Regions  | Gene                         | Location                                | Product                                                                                     | Possible IS-mediated deletions in <i>Y. pestis</i> | Putative regions of lateral transfer |
|----------|------------------------------|-----------------------------------------|---------------------------------------------------------------------------------------------|----------------------------------------------------|--------------------------------------|
| 1        | YPTB0149                     | 181028..181282                          | putative colicin immunity protein                                                           |                                                    | phage                                |
|          | YPTB0150                     | 181435..181854                          | putative pyocin S2                                                                          |                                                    |                                      |
|          | YPTB0151                     | 181856..182110                          | pyocin S2 immunity protein                                                                  |                                                    |                                      |
|          | YPTB0152                     | 182263..182691                          | putative pyocin S2                                                                          |                                                    |                                      |
|          | YPTB0153                     | 182688..182951                          | putative colicin immunity protein                                                           |                                                    |                                      |
|          | YPTB0154                     | 183509..183880                          | probable phage antitermination protein Q                                                    |                                                    |                                      |
| YPTB0155 | 184491..184826               | hypothetical                            |                                                                                             |                                                    |                                      |
| 2        | YPTB0187                     | complement(227114..228151)              | possible Pentapeptide repeats protein                                                       |                                                    |                                      |
| 3        | YPTB0244                     | 287857..288525                          | hypothetical                                                                                |                                                    |                                      |
|          | YPTB0245                     | 288538..289740                          | conserved hypothetical protein                                                              |                                                    |                                      |
| 4        | YPTB0535                     | complement(628794..632042)              | putative type I restriction enzyme, R subunit                                               |                                                    | other                                |
|          | YPTB0536                     | complement(632052..633335)              | putative type I restriction enzyme, S subunit                                               |                                                    |                                      |
|          | YPTB0537                     | complement(633337..635928)              | putative type I restriction-modification system, methyltransferase subunit (N-6 DNA Methyla |                                                    |                                      |
| 5        | YPTB0557                     | 658664..659932                          | possible conserved cysteine desulfurase                                                     |                                                    |                                      |
|          | YPTB0558                     | 659979..661157                          | possible acyl-CoA dehydrogenase                                                             |                                                    |                                      |
|          | YPTB0559                     | 661159..661434                          | hypothetical protein                                                                        |                                                    |                                      |
|          | YPTB0560                     | 661436..662272                          | hypothetical protein                                                                        |                                                    |                                      |
|          | YPTB0561                     | 662305..663531                          | putative protein involved in molybdopterin biosynthesis                                     |                                                    |                                      |
|          | YPTB0562                     | complement(663713..663949)              | putative transposase                                                                        |                                                    |                                      |
| 6        | YPTB0664                     | 794132..795634                          | hypothetical protein                                                                        |                                                    | other                                |
|          | YPTB0665                     | complement(795879..796010)              | conserved hypothetical protein                                                              |                                                    |                                      |
|          | YPTB0666                     | complement(796037..796414)              | putative IS1400 transposase E                                                               |                                                    |                                      |
| 7        | YPTB0872                     | complement(1047598..1048368)            | putative amidase-type enzyme                                                                |                                                    |                                      |
|          | YPTB0873                     | complement(1048356..1049516)            | putative aspartate aminotransferase                                                         |                                                    |                                      |
|          | YPTB0874                     | 1049656..1050324                        | probable sugar aldolase                                                                     |                                                    |                                      |
|          | YPTB0875                     | 1050321..1051010                        | enolase-phosphatase E-1                                                                     |                                                    |                                      |
|          | YPTB0876                     | 1051109..1051651                        | methionine salvage pathway enzyme E-2/E-2'                                                  |                                                    |                                      |
|          | YPTB0877                     | complement(1051684..1052724)            | putative translation initiation factor EIF-2B, GDP-GTP exchange factor (alpha subunit)      |                                                    |                                      |
|          | YPTB0878                     | 1052920..1054143                        | 5-methylthioribose kinase                                                                   |                                                    |                                      |
| 8        | YPTB1058                     | 1262526..1266098                        | conserved hypothetical protein                                                              | IS285                                              |                                      |
| 9        | YPTB1202                     | 1432494..1433750                        | xanthosine permease                                                                         |                                                    | IS1541                               |
|          | YPTB1203                     | complement(1433838..1434311)            | conserved hypothetical protein                                                              |                                                    |                                      |
|          | YPTB1204                     | 1434661..1436475                        | possible 2-component Histidine kinase-sensor                                                |                                                    |                                      |
|          | YPTB1205                     | 1436462..1437826                        | transcriptional regulatory protein hydG                                                     |                                                    |                                      |
|          | YPTB1206                     | 1438174..1439283                        | morphinone reductase                                                                        |                                                    |                                      |
|          | YPTB1207                     | complement(1439284..1440195)            | putative transcriptional regulator                                                          |                                                    |                                      |
|          | YPTB1208                     | 1440765..1441091                        | conserved hypothetical protein                                                              |                                                    |                                      |
|          | YPTB1209                     | complement(1441130..1442236)            | conserved hypothetical protein                                                              |                                                    |                                      |
|          | YPTB1210                     | complement(1442249..1443424)            | conserved hypothetical protein                                                              |                                                    |                                      |
|          | YPTB1211                     | complement(1443249..1445171)            | putative ATP-binding component of a transport system                                        |                                                    |                                      |
|          | YPTB1212                     | complement(1445185..1446171)            | putative membrane protein                                                                   |                                                    |                                      |
| 10       | YPTB1213                     | complement(1446223..1446933)            | putative transcriptional regulator                                                          |                                                    | phage                                |
|          | YPTB1214                     | 1447324..1448679                        | putative ATP-dependent RNA helicase rhlE                                                    |                                                    |                                      |
|          | YPTB1287                     | 1535793..1536419                        | bacteriophage tail fiber protein                                                            |                                                    |                                      |
| YPTB1288 | 1536421..1536840             | putative tail fiber assembly protein p3 |                                                                                             |                                                    |                                      |
| 11       | YPTB1292                     | complement(1540821..1541105)            | putative colicin immunity protein                                                           |                                                    | other                                |
|          | YPTB1293                     | complement(1541134..1541391)            | conserved hypothetical protein                                                              |                                                    |                                      |
|          | YPTB1491                     | 1787812..1789083                        | hypothetical                                                                                |                                                    |                                      |
| 12       | YPTB1492                     | 1789090..1789482                        | putative lipoprotein                                                                        |                                                    |                                      |
|          | YPTB1493                     | 1789798..1792500                        | conserved hypothetical protein                                                              |                                                    |                                      |
|          | YPTB1494                     | 1792503..1792919                        | hypothetical                                                                                |                                                    |                                      |
|          | YPTB1495                     | 1792928..1794676                        | possible LysM domain                                                                        |                                                    |                                      |
|          | YPTB1496                     | 1794681..1795193                        | hypothetical                                                                                |                                                    |                                      |
| 13       | YPTB1564                     | complement(1882973..1883629)            | hypothetical                                                                                |                                                    |                                      |
| 14       | YPTB1690                     | complement(2046009..2046608)            | hypothetical                                                                                |                                                    |                                      |
|          | YPTB1738                     | complement(2097207..2097422)            | prophage p2 ogr protein                                                                     |                                                    |                                      |
|          | YPTB1739                     | complement(2097514..2098680)            | similar to D protein bacteriophage 186 and P2                                               |                                                    |                                      |
|          | YPTB1740                     | complement(2098677..2099162)            | putative phage tail protein                                                                 |                                                    |                                      |
|          | YPTB1741                     | complement(2099162..2101588)            | putative bacteriophage P2 tail protein gpT                                                  |                                                    |                                      |
|          | YPTB1742                     | complement(2101581..2101703)            | gpE+E' [Enterobacteria phage P2] gb/AAD03292.1] (AF063097) g...                             |                                                    |                                      |
|          | YPTB1743                     | complement(2101736..2102047)            | putative tail protein gpE P2 bacteriophage                                                  |                                                    |                                      |
|          | YPTB1744                     | complement(2102098..2102613)            | putative tail tube protein FII (bacteriophage P2)                                           |                                                    |                                      |
|          | YPTB1745                     | complement(2102627..2103796)            | putative tail sheath protein (P2 and 186 bacteriophage)                                     |                                                    |                                      |
|          | YPTB1746                     | complement(2103924..2104406)            | conserved hypothetical phage tail fiber protein                                             |                                                    |                                      |
|          | YPTB1747                     | complement(2104418..2105857)            | hypothetical phage tail fiber protein                                                       |                                                    |                                      |
|          | YPTB1748                     | complement(2105854..2106462)            | putative bacteriophage protein                                                              |                                                    |                                      |
|          | YPTB1749                     | complement(2106455..2107363)            | probable bacteriophage protein                                                              |                                                    |                                      |
|          | YPTB1750                     | complement(2107368..2107718)            | possible phage-related protein                                                              |                                                    |                                      |
|          | YPTB1751                     | complement(2107715..2108356)            | putative phage-related baseplate assembly protein                                           |                                                    |                                      |
|          | YPTB1752                     | complement(2108430..2108879)            | O protein [Enterobacteria phage 186] gb/AAC34159.1] (U32222)...                             |                                                    |                                      |
|          | YPTB1753                     | complement(2108876..2109331)            | gpR [Enterobacteria phage P2] sp/P36933/VPR_BPP2 TAIL COMPLE...                             |                                                    |                                      |
|          | YPTB1754                     | complement(2109427..2109843)            | putative Orf27, P2 LysB homolog; control of lysis [Ente...                                  |                                                    |                                      |
|          | YPTB1755                     | complement(2109845..2110351)            | putative phage lysozyme                                                                     |                                                    |                                      |
|          | YPTB1756                     | complement(2110335..2110569)            | likely phage related protein                                                                |                                                    |                                      |
|          | YPTB1757                     | complement(2110547..2110750)            | putative phage-related tail protein                                                         |                                                    |                                      |
|          | YPTB1758                     | complement(2110750..2111223)            | gpL [Enterobacteria phage P2] sp/P25475/VPL_BPP2 HEAD COMPLE...                             |                                                    |                                      |
|          | YPTB1759                     | complement(2111323..2111982)            | R protein [Enterobacteria phage 186] gb/AAC34151.1] (U32222)...                             |                                                    |                                      |
|          | YPTB1760                     | complement(2111986..2113224)            | (AJ298563) major capsid protein [Bacteriophage PhiD266]                                     |                                                    |                                      |
|          | YPTB1761                     | complement(2113301..2114155)            | similar to V protein bacteriophage 186                                                      |                                                    |                                      |
|          | YPTB1762                     | 2114304..2116076                        | terminase subunit [Enterobacteria phage 186] gb/AAC3414...                                  |                                                    |                                      |
|          | YPTB1763                     | 2116073..2116837                        | putative W protein [Enterobacteria phage 186] gb/AAC34147.1]...                             |                                                    |                                      |
|          | YPTB1764                     | 2116834..2117871                        | capsid portal protein [Enterobacteria phage 186] gb/AAC...                                  |                                                    |                                      |
|          | YPTB1765                     | complement(2118623..2118982)            | putative gp46 [Bacteriophage N15] pif/T13133 protein gp46 ...                               |                                                    |                                      |
|          | YPTB1766                     | complement(2119005..2121287)            | putative phage P2 replication protein                                                       |                                                    |                                      |
|          | YPTB1767                     | complement(2121274..2121546)            | hypothetical protein 79 phage 186                                                           |                                                    |                                      |
|          | YPTB1768                     | complement(2121612..2121923)            | similar to gpB bacteriophage P2                                                             |                                                    |                                      |
|          | YPTB1769                     | complement(2122130..2122639)            | regulatory protein CII bacteriophage 186                                                    |                                                    |                                      |
|          | YPTB1770                     | complement(2122694..2122891)            | putative regulator for prophage CP-933T (E. coli O157:H7)                                   |                                                    |                                      |
|          | YPTB1771                     | 2122962..2123573                        | CI repressor of phage 186 and others                                                        |                                                    |                                      |
|          | YPTB1772                     | 2123601..2124872                        | hypothetical protein                                                                        |                                                    |                                      |
|          | YPTB1773                     | 2124872..2125750                        | hypothetical                                                                                |                                                    |                                      |
|          | YPTB1774                     | 2125870..2126925                        | putative integrase                                                                          |                                                    |                                      |
|          | YPTB1775                     | 2126922..2127968                        | hypothetical                                                                                |                                                    |                                      |
|          | YPTB1776                     | complement(2128303..2129325)            | putative integrase                                                                          |                                                    |                                      |
|          | YPTB1777                     | complement(2129645..2130148)            | hypothetical                                                                                |                                                    |                                      |
|          | YPTB1778                     | complement(2130242..2130580)            | hypothetical                                                                                |                                                    |                                      |
|          | YPTB1779                     | complement(2130712..2131575)            | hypothetical                                                                                |                                                    |                                      |
|          | YPTB1780                     | complement(2131934..2132170)            | hypothetical                                                                                |                                                    |                                      |
| YPTB1781 | complement(2132407..2132835) | hypothetical                            |                                                                                             |                                                    |                                      |
| YPTB1782 | complement(2132832..2133971) | hypothetical                            |                                                                                             |                                                    |                                      |
| YPTB1783 | complement(2134016..2135620) | conserved hypothetical protein          |                                                                                             |                                                    |                                      |
| YPTB1784 | complement(2135607..2136449) | conserved hypothetical protein          |                                                                                             |                                                    |                                      |
| YPTB1785 | complement(2136750..2137088) | hypothetical protein                    |                                                                                             |                                                    |                                      |
| YPTB1786 | complement(2137092..2137598) | hypothetical protein                    |                                                                                             |                                                    |                                      |
| YPTB1787 | complement(2138463..2138732) | hypothetical protein                    |                                                                                             |                                                    |                                      |
| YPTB1788 | complement(2138817..2139062) | hypothetical protein                    |                                                                                             |                                                    |                                      |
| YPTB1789 | complement(2139340..2139957) | hypothetical protein                    |                                                                                             |                                                    |                                      |

|    |          |                              |                                                                  |                                                       |       |       |
|----|----------|------------------------------|------------------------------------------------------------------|-------------------------------------------------------|-------|-------|
| 15 | YPTB1790 | complement(2139968..2140654) | putative prophage repressor protein                              |                                                       |       |       |
|    | YPTB1791 | 2140734..2141024             | hypothetical protein                                             |                                                       |       |       |
|    | YPTB1792 | 2141042..2141404             | hypothetical protein                                             |                                                       |       |       |
|    | YPTB1793 | 2141589..2142434             | putative phage protein                                           |                                                       |       |       |
|    | YPTB1794 | 2142438..2143214             | hypothetical protein                                             |                                                       |       |       |
|    | YPTB1795 | 2143218..2144354             | possible recombination associated protein RdcC                   |                                                       |       |       |
|    | YPTB1796 | 2144354..2144701             | hypothetical protein                                             |                                                       |       |       |
|    | YPTB1797 | 2144698..2145624             | putative DNA methyltransferase                                   |                                                       |       |       |
|    | YPTB1798 | 2145621..2146496             | conserved hypothetical protein                                   |                                                       |       |       |
|    | YPTB1799 | 2146493..2148238             | putative modification methylase                                  |                                                       |       |       |
|    | YPTB1800 | 2148235..2148882             | conserved putative phage protein                                 |                                                       |       |       |
|    | YPTB1801 | 2149276..2150211             | hypothetical protein                                             |                                                       |       |       |
|    | YPTB1802 | 2150208..2150666             | hypothetical protein                                             |                                                       |       |       |
|    | YPTB1803 | 2150978..2151787             | hypothetical protein                                             |                                                       |       |       |
|    | YPTB1804 | 2151960..2152172             | putative holin protein                                           |                                                       |       |       |
|    | YPTB1805 | 2152172..2152660             | probable endolysin (lysis protein) (lysozyme)                    |                                                       |       |       |
|    | YPTB1806 | 2152792..2153310             | hypothetical protein                                             |                                                       | phage |       |
|    | YPTB1807 | 2153528..2153968             | putative UNKNOWN PROTEIN [Lactococcus lactis subsp. lac...       |                                                       |       |       |
|    | YPTB1808 | 2154075..2155097             | putative transposase IS100                                       |                                                       |       |       |
|    | YPTB1809 | 2155097..2155876             | putative IS100 transposase                                       |                                                       |       |       |
|    | YPTB1810 | 2155994..2156851             | putative small subunit bacteriophage terminase                   |                                                       |       |       |
|    | YPTB1811 | 2156848..2158554             | putative bacteriophage terminase large subunit                   |                                                       |       |       |
|    | YPTB1812 | 2158554..2160674             | putative phage portal protein                                    |                                                       |       |       |
|    | YPTB1813 | 2160944..2161993             | putative phage I protein                                         |                                                       |       |       |
|    | YPTB1814 | 2162053..2163276             | putative phage protein                                           |                                                       |       |       |
|    | YPTB1815 | 2163354..2163737             | putative phage protein                                           |                                                       |       |       |
|    | YPTB1816 | 2163803..2164255             | putative phage protein                                           |                                                       |       |       |
|    | YPTB1817 | 2164258..2164854             | conserved hypothetical protein                                   |                                                       |       |       |
|    | YPTB1818 | 2164854..2165507             | putative phage protein                                           |                                                       |       |       |
|    | YPTB1819 | 2165504..2167639             | hypothetical phage protein                                       |                                                       |       |       |
|    | YPTB1820 | 2167650..2168114             | putative phage tail fiber assembly protein                       |                                                       |       |       |
|    | YPTB1821 | complement(2168127..2168453) | putative acyl carrier protein                                    |                                                       |       |       |
|    | YPTB1822 | complement(2168447..2168911) | putative membrane protein                                        |                                                       |       |       |
|    | YPTB1823 | 2169143..2170771             | phage hypothetical protein                                       |                                                       |       |       |
|    | YPTB1824 | 2170768..2171874             | bacteriophage hypothetical protein                               |                                                       |       |       |
|    | YPTB1825 | 2171941..2172972             | conserved hypothetical protein                                   |                                                       |       |       |
|    | YPTB1826 | 2172947..2173321             | bacteriophage hypothetical protein                               |                                                       |       |       |
|    | YPTB1827 | 2173329..2173934             | bacteriophage hypothetical protein                               |                                                       |       |       |
|    | YPTB1828 | 2173950..2174333             | bacteriophage hypothetical protein                               |                                                       |       |       |
|    | YPTB1829 | 2174333..2174572             | bacteriophage hypothetical protein                               |                                                       |       |       |
|    | YPTB1830 | 2174583..2175974             | bacteriophage hypothetical protein                               |                                                       |       |       |
|    | YPTB1831 | 2176308..2182709             | bacteriophage hypothetical protein                               |                                                       |       |       |
|    | YPTB1832 | 2182663..2184330             | hypothetical protein                                             |                                                       |       |       |
|    | YPTB1833 | complement(2184581..2184985) | hypothetical                                                     |                                                       |       |       |
|    | YPTB1834 | complement(2185864..2186037) | prophage p2 ogr protein                                          |                                                       |       |       |
|    | YPTB1835 | complement(2186112..2187206) | bacteriophage P2 gpD protein                                     |                                                       |       |       |
|    | YPTB1836 | complement(2187203..2187667) | putative bacteriophage P2 tail protein                           |                                                       |       |       |
|    | YPTB1837 | complement(2187679..2190594) | putative tail fiber component T of bacteriophage P2              |                                                       |       |       |
|    | YPTB1838 | complement(2190587..2190709) | gpE+E [Enterobacteria phage P2] gb/AAD03292.1] (AF063097) g...   |                                                       |       |       |
|    | YPTB1839 | complement(2190721..2191068) | possible (AF153829) unknown [Salmonella typhi]                   |                                                       |       |       |
|    | YPTB1840 | complement(2191122..2191637) | putative P2 tail tube protein                                    |                                                       |       |       |
|    | YPTB1841 | complement(2191649..2192824) | putative bacteriophage P2 tail sheath protein                    |                                                       |       |       |
|    | YPTB1842 | complement(2192958..2193437) | conserved hypothetical protein                                   |                                                       |       |       |
|    | YPTB1843 | complement(2193449..2194888) | bacteriophage hypothetical protein                               |                                                       |       |       |
|    | YPTB1844 | complement(2194885..2195493) | putative bacteriophage P2 protein                                |                                                       |       |       |
|    | YPTB1845 | complement(2195486..2196394) | putative bacteriophage P2 related protein                        |                                                       |       |       |
|    | YPTB1846 | complement(2196397..2196750) | putative phage-related protein                                   |                                                       |       |       |
|    | YPTB1847 | complement(2196747..2197382) | Orf32; P2 V homolog; baseplate protein [Enterobacteria ...       |                                                       |       |       |
|    | YPTB1848 | complement(2197713..2198429) | hypothetical protein                                             |                                                       |       |       |
|    | YPTB1849 | complement(2198746..2199192) | putative O protein [bacterio phage 186] gb/AAC34159.1]...        |                                                       |       |       |
|    | YPTB1850 | complement(2199189..2199656) | gpR [Enterobacteria phage P2] sp/P36933/VPR_BFP2 TAIL COMPLE...  |                                                       |       |       |
|    | YPTB1851 | complement(2199755..2200180) | putative (AB008550) orf12, similar to LysB gene of P21...        |                                                       |       |       |
|    | YPTB1852 | complement(2200185..2200580) | bacteriophage P7 related protein                                 |                                                       |       |       |
|    | YPTB1853 | complement(2200567..2200953) | conserved hypothetical protein                                   |                                                       |       |       |
|    | YPTB1854 | complement(2200983..2201186) | putative WPhage-related tail protein                             |                                                       |       |       |
|    | YPTB1855 | complement(2201186..2201677) | putative orf4 of phage P2 (gene L)                               |                                                       |       |       |
|    | YPTB1856 | complement(2201911..2202564) | putative R protein bacteriophage 186 gb/AAC34151.1]              |                                                       |       |       |
|    | YPTB1857 | complement(2202571..2203626) | putative major capsid protein [Bacteriophage PhiD5]              |                                                       |       |       |
|    | YPTB1858 | complement(2203663..2204478) | similar to V protein phage 186                                   |                                                       |       |       |
|    | YPTB1859 | 2204649..2206412             | similar to gpP phage P2 TERMINASE                                |                                                       |       |       |
|    | YPTB1860 | 2206460..2207452             | similar to capsid portal protein bacteriophage 186 gb/AAC...     |                                                       |       |       |
|    | YPTB1861 | complement(2208134..2208478) | putative Bacteriophage protein gp46                              |                                                       |       |       |
|    | YPTB1862 | complement(2208686..2211241) | putative phage replication protein                               |                                                       |       |       |
|    | YPTB1863 | complement(2211330..2212148) | putative DNA adenine methylase                                   |                                                       |       |       |
|    | YPTB1864 | complement(2212145..2212798) | similar to Orf1 bacteriophage 186                                |                                                       |       |       |
|    | YPTB1865 | complement(2212855..2213622) | hypothetical protein                                             |                                                       |       |       |
|    | YPTB1866 | complement(2213705..2214013) | hypothetical protein                                             |                                                       |       |       |
|    | YPTB1867 | complement(2214041..2214301) | hypothetical protein                                             |                                                       |       |       |
|    | YPTB1868 | complement(2214443..2214757) | hypothetical protein                                             |                                                       |       |       |
|    | YPTB1869 | complement(2214972..2215175) | putative DNA-binding protein                                     |                                                       |       |       |
|    | YPTB1870 | 2215440..2215808             | putative prophage transcriptional regulator                      |                                                       |       |       |
|    | YPTB1871 | 2215829..2217526             | similar to hypothetical bacteriophage P27 protein                |                                                       |       |       |
|    | YPTB1872 | 2217547..2217966             | putative bacteriophage integrase                                 |                                                       |       |       |
|    | YPTB1873 | 2218035..2218415             | hypothetical protein                                             |                                                       |       |       |
|    | YPTB1874 | 2218415..2218747             | putative bacteriophage integrase                                 |                                                       |       |       |
|    | YPTB1875 | 2219041..2219418             | putative phage integrase                                         |                                                       |       |       |
|    | 16       | YPTB1884                     | 2225288..2226646                                                 | possible multidrug-efflux transporter                 |       | other |
|    |          | YPTB1885                     | 2226643..2228376                                                 | possible ThiF family                                  |       |       |
|    |          | YPTB1886                     | 2228366..2229091                                                 | conserved hypothetical protein                        |       |       |
|    |          | YPTB1887                     | 2229079..2229933                                                 | hypothetical protein                                  |       |       |
|    |          | YPTB1888                     | 2229918..2230730                                                 | conserved hypothetical protein                        |       |       |
|    | YPTB1889 | 2230727..2231893             | possible diaminopimelate decarboxylase                           |                                                       |       |       |
|    | YPTB1890 | 2231868..2232425             | putative similar to ribosomal-protein-alanine N-acetyltransfe... |                                                       |       |       |
|    | YPTB1891 | complement(2232455..2232757) | weak similarity to Vibrio transposas                             |                                                       |       |       |
|    | 17       | YPTB2180                     | complement(2565873..2566877)                                     | adenosine deaminase                                   |       |       |
|    |          | YPTB2181                     | 2567266..2568522                                                 | hypothetical                                          |       |       |
|    |          | YPTB2182                     | complement(2568695..2569624)                                     | conserved hypothetical protein                        |       |       |
|    |          | YPTB2183                     | 2569923..2570747                                                 | putative transcriptional regulator                    |       |       |
|    | 18       | YPTB2193                     | complement(2583135..2583380)                                     | conserved hypothetical protein                        |       |       |
|    |          | YPTB2194                     | complement(2583594..2583968)                                     | conserved hypothetical protein                        |       |       |
|    |          | YPTB2195                     | complement(2584195..2584944)                                     | probable oxidoreductase in dep-nohA intergenic region |       |       |
|    |          | YPTB2196                     | complement(2585058..2586860)                                     | putative transcriptional regulator                    |       |       |
|    |          | YPTB2197                     | 2587156..2588876                                                 | probable aldehyde dehydrogenase                       |       |       |
|    |          | YPTB2198                     | complement(2588957..2590555)                                     | (AF335466) unknown [Yersinia pseudotuberculosis]      |       |       |
|    | YPTB2199 | 2591079..2592002             | putative membrane protein                                        |                                                       |       |       |
|    | 19       | YPTB2200                     | complement(2592808..2593986)                                     | putative aminotransferase                             |       |       |
|    |          | YPTB2201                     | complement(2593973..2594542)                                     | conserved hypothetical protein                        |       |       |
|    | 20       | YPTB2205                     | complement(2597263..2598324)                                     | ribose ABC transporter, permease protein              |       |       |
|    |          | YPTB2206                     | complement(2598351..2599889)                                     | putative ribose ABC transporter, ATP-binding protein  |       |       |
|    |          | YPTB2207                     | complement(2599886..2600539)                                     | conserved hypothetical protein                        |       |       |
|    | YPTB2455 | 2900644..2900910             | putative phage replication protein gene fragment                 |                                                       |       |       |
|    | YPTB2456 | 2901382..2901567             | hypothetical                                                     |                                                       |       |       |

|    |                                                                                                                                                                                                                                                                                                                                                                                                          |                                                                                                                                                                                                                                                                                                                                                                                                                                                                                                                                                                                                                                                                                                                                              |                                                                                                                                                                                                                                                                                                                                                                                                                                                                                                                                                                                                                                                                                                                                                                                                                                                                                                                                                                                                                                                                                                                                                                                                                                                                                              |        |       |
|----|----------------------------------------------------------------------------------------------------------------------------------------------------------------------------------------------------------------------------------------------------------------------------------------------------------------------------------------------------------------------------------------------------------|----------------------------------------------------------------------------------------------------------------------------------------------------------------------------------------------------------------------------------------------------------------------------------------------------------------------------------------------------------------------------------------------------------------------------------------------------------------------------------------------------------------------------------------------------------------------------------------------------------------------------------------------------------------------------------------------------------------------------------------------|----------------------------------------------------------------------------------------------------------------------------------------------------------------------------------------------------------------------------------------------------------------------------------------------------------------------------------------------------------------------------------------------------------------------------------------------------------------------------------------------------------------------------------------------------------------------------------------------------------------------------------------------------------------------------------------------------------------------------------------------------------------------------------------------------------------------------------------------------------------------------------------------------------------------------------------------------------------------------------------------------------------------------------------------------------------------------------------------------------------------------------------------------------------------------------------------------------------------------------------------------------------------------------------------|--------|-------|
| 21 | YPTB2457<br>YPTB2458<br>YPTB2459<br>YPTB2460<br>YPTB2461<br>YPTB2462                                                                                                                                                                                                                                                                                                                                     | complement(2901687..2902217)<br>complement(2902330..2903445)<br>complement(2903918..2905096)<br>complement(2905610..2906083)<br>2906112..2906390<br>2906975..2907220                                                                                                                                                                                                                                                                                                                                                                                                                                                                                                                                                                         | hypothetical<br>hypothetical<br>hypothetical<br>putative capsid portal protein [Enterobacteria phage 18...]<br>hypothetical<br>conserved hypothetical protein                                                                                                                                                                                                                                                                                                                                                                                                                                                                                                                                                                                                                                                                                                                                                                                                                                                                                                                                                                                                                                                                                                                                | IS1541 | phage |
| 22 | YPTB2490<br>YPTB2491<br>YPTB2492<br>YPTB2493<br>YPTB2494<br>YPTB2495<br>YPTB2496<br>YPTB2497                                                                                                                                                                                                                                                                                                             | 2936394..2937314<br>2938011..2939549<br>complement(2939796..2940128)<br>complement(2940161..2942770)<br>complement(2942763..2944349)<br>2944676..2945572<br>2945778..2946023<br>2946367..2948094                                                                                                                                                                                                                                                                                                                                                                                                                                                                                                                                             | lipid A biosynthesis lauroyl acyltransferase<br>putative di-tripeptide transport system permease protein<br>conserved hypothetical protein<br>hypothetical<br>membrane glycosyltransferase<br>periplasmic glucans biosynthesis protein<br>glucans biosynthesis protein (partial)<br>hypothetical<br>conserved hypothetical protein                                                                                                                                                                                                                                                                                                                                                                                                                                                                                                                                                                                                                                                                                                                                                                                                                                                                                                                                                           |        |       |
| 23 | YPTB2539                                                                                                                                                                                                                                                                                                                                                                                                 | complement(3006939..3007601)                                                                                                                                                                                                                                                                                                                                                                                                                                                                                                                                                                                                                                                                                                                 | conserved hypothetical protein                                                                                                                                                                                                                                                                                                                                                                                                                                                                                                                                                                                                                                                                                                                                                                                                                                                                                                                                                                                                                                                                                                                                                                                                                                                               |        |       |
| 24 | YPTB2749<br>YPTB2750<br>YPTB2751<br>YPTB2752<br>YPTB2752<br>YPTB2752                                                                                                                                                                                                                                                                                                                                     | complement(3249394..3250119)<br>complement(3250122..3250829)<br>complement(3250826..3251497)<br>3251579..3251869<br>3251854..3251988<br>3252037..3252162                                                                                                                                                                                                                                                                                                                                                                                                                                                                                                                                                                                     | hypothetical<br>hypothetical<br>hypothetical<br>part of IS630<br>part of IS630 orfA - pseudogene<br>part of IS630 orfA - pseudogene                                                                                                                                                                                                                                                                                                                                                                                                                                                                                                                                                                                                                                                                                                                                                                                                                                                                                                                                                                                                                                                                                                                                                          |        | other |
| 25 | YPTB2793                                                                                                                                                                                                                                                                                                                                                                                                 | complement(3295818..3297104)                                                                                                                                                                                                                                                                                                                                                                                                                                                                                                                                                                                                                                                                                                                 | uracil transport                                                                                                                                                                                                                                                                                                                                                                                                                                                                                                                                                                                                                                                                                                                                                                                                                                                                                                                                                                                                                                                                                                                                                                                                                                                                             | IS1541 |       |
| 26 | YPTB3129<br>YPTB3130<br>YPTB3131<br>YPTB3132<br>YPTB3133<br>YPTB3134<br>YPTB3135<br>YPTB3136<br>YPTB3137<br>YPTB3138<br>YPTB3139<br>YPTB3140<br>YPTB3141<br>YPTB3142<br>YPTB3143<br>YPTB3144<br>YPTB3145<br>YPTB3146<br>YPTB3147<br>YPTB3148<br>YPTB3149<br>YPTB3150<br>YPTB3151<br>YPTB3152<br>YPTB3153<br>YPTB3154<br>YPTB3155<br>YPTB3156<br>YPTB3157<br>YPTB3352<br>YPTB3159<br>YPTB3160<br>YPTB3161 | complement(3688397..3689380)<br>complement(3689447..3689794)<br>3689860..3690132<br>3690338..3690622<br>3691181..3691450<br>3691680..3692030<br>3692337..3693002<br>3693012..3693713<br>3694060..3696615<br>complement(3696877..3697203)<br>complement(3697200..3698267)<br>complement(3698264..3700069)<br>3700242..3701330<br>3701365..3702393<br>3702396..3703100<br>3703209..3703682<br>3703679..3704173<br>3704170..3704829<br>3704853..3706019<br>3706022..3706477<br>3706487..3706789<br>3706786..3707127<br>3707127..3707501<br>3707616..3707891<br>3708117..3710093<br>3710090..3710419<br>3710416..3711600<br>3711593..3712216<br>3712226..3713821<br>3983362..3983775<br>3714336..3715046<br>3715039..3715593<br>3715590..3717311 | Possible phage integrase/recombinase<br>Putative [Enterobacteria phage P2] gpC-like protein.<br>Probable bacteriophage Cox protein<br>hypothetical protein<br>Hypothetical<br>Conserved hypothetical protein<br>putative conserved bacteriophage protein<br>putative conserved bacteriophage protein<br>Putative phage protein.<br>Possible (AB008550) orf34 [bacteriophage phi CTX]<br>Hypothetical, similar to orf34 (AB008550) [phage phi CTX].<br>Possible [Haemophilus phage HPI1] orf16-like phage protein.<br>hypothetical phage protein<br>probable phage protein<br>Conserved hypothetical phage protein<br>possible phage P2 holin-like protein<br>Hypothetical<br>hypothetical<br>hypothetical protein similar to protein 26 - phage HPI<br>Putative bacteriophage tail protein.<br>hypothetical protein similar to protein 28 - phage HPI<br>Putative bacteriophage protein.<br>Putative bacteriophage protein.<br>Hypothetical protein<br>Flagellar switch protein<br>Possible bacteriophage protein.<br>Hypothetical protein similar to protein 34 (AY27935) - Phage HP2<br>Hypothetical bacteriophage protein |        | phage |
| 27 | YPTB3274<br>YPTB3275<br>YPTB3276                                                                                                                                                                                                                                                                                                                                                                         | complement(3859378..3859902)<br>complement(3860127..3860465)<br>complement(3860595..3861122)                                                                                                                                                                                                                                                                                                                                                                                                                                                                                                                                                                                                                                                 | hypothetical<br>hypothetical<br>hypothetical                                                                                                                                                                                                                                                                                                                                                                                                                                                                                                                                                                                                                                                                                                                                                                                                                                                                                                                                                                                                                                                                                                                                                                                                                                                 |        |       |
| 28 | YPTB3279<br>YPTB3280<br>YPTB3281                                                                                                                                                                                                                                                                                                                                                                         | complement(3864435..3865094)<br>complement(3865483..3865908)<br>complement(3866252..3866743)                                                                                                                                                                                                                                                                                                                                                                                                                                                                                                                                                                                                                                                 | Hypothetical<br>Hypothetical<br>Hypothetical                                                                                                                                                                                                                                                                                                                                                                                                                                                                                                                                                                                                                                                                                                                                                                                                                                                                                                                                                                                                                                                                                                                                                                                                                                                 |        |       |
| 29 | YPTB3364<br>YPTB3365<br>YPTB3366<br>YPTB3367<br>YPTB3368<br>YPTB3369                                                                                                                                                                                                                                                                                                                                     | complement(3997470..3998000)<br>3999120..4000535<br>4000604..4002013<br>4002384..4002578<br>4003499..4004086<br>4004309..4004506                                                                                                                                                                                                                                                                                                                                                                                                                                                                                                                                                                                                             | fimbriae<br>Putative Serratia marcescens-like C1 chitinase.<br>chitin-binding protein<br>Possible transposase fragment.<br>Possible Yersinia enterocolitica-like Orf1 (AF005744)<br>Hypothetical                                                                                                                                                                                                                                                                                                                                                                                                                                                                                                                                                                                                                                                                                                                                                                                                                                                                                                                                                                                                                                                                                             | IS1541 | other |
| 30 | YPTB3451<br>YPTB3452<br>YPTB3453                                                                                                                                                                                                                                                                                                                                                                         | complement(4098135..4098386)<br>complement(4098388..4098705)<br>complement(4098990..4099343)                                                                                                                                                                                                                                                                                                                                                                                                                                                                                                                                                                                                                                                 | Hypothetical<br>conserved hypothetical protein<br>hypothetical                                                                                                                                                                                                                                                                                                                                                                                                                                                                                                                                                                                                                                                                                                                                                                                                                                                                                                                                                                                                                                                                                                                                                                                                                               |        |       |
| 31 | YPTB3455                                                                                                                                                                                                                                                                                                                                                                                                 | complement(4101394..4101894)                                                                                                                                                                                                                                                                                                                                                                                                                                                                                                                                                                                                                                                                                                                 | conserved hypothetical protein                                                                                                                                                                                                                                                                                                                                                                                                                                                                                                                                                                                                                                                                                                                                                                                                                                                                                                                                                                                                                                                                                                                                                                                                                                                               |        |       |
| 32 | YPTB3458<br>YPTB3459                                                                                                                                                                                                                                                                                                                                                                                     | complement(4108387..4108776)<br>complement(4108782..4109594)                                                                                                                                                                                                                                                                                                                                                                                                                                                                                                                                                                                                                                                                                 | hypothetical<br>hypothetical protein                                                                                                                                                                                                                                                                                                                                                                                                                                                                                                                                                                                                                                                                                                                                                                                                                                                                                                                                                                                                                                                                                                                                                                                                                                                         |        |       |
| 33 | YPTB3620                                                                                                                                                                                                                                                                                                                                                                                                 | complement(4306508..4307125)                                                                                                                                                                                                                                                                                                                                                                                                                                                                                                                                                                                                                                                                                                                 | hypothetical protein                                                                                                                                                                                                                                                                                                                                                                                                                                                                                                                                                                                                                                                                                                                                                                                                                                                                                                                                                                                                                                                                                                                                                                                                                                                                         |        |       |
| 34 | YPTB3613<br>YPTB3614                                                                                                                                                                                                                                                                                                                                                                                     | complement(4297082..4297327)<br>complement(4297516..4297797)                                                                                                                                                                                                                                                                                                                                                                                                                                                                                                                                                                                                                                                                                 | rhs accessory<br>hypothetical                                                                                                                                                                                                                                                                                                                                                                                                                                                                                                                                                                                                                                                                                                                                                                                                                                                                                                                                                                                                                                                                                                                                                                                                                                                                |        |       |
| 35 | YPTB3795                                                                                                                                                                                                                                                                                                                                                                                                 | complement(4526143..4527395)                                                                                                                                                                                                                                                                                                                                                                                                                                                                                                                                                                                                                                                                                                                 | conserved hypothetical protein                                                                                                                                                                                                                                                                                                                                                                                                                                                                                                                                                                                                                                                                                                                                                                                                                                                                                                                                                                                                                                                                                                                                                                                                                                                               |        |       |
| 36 | YPTB3862<br>YPTB3863<br>YPTB3865<br>YPTB3866<br>YPTB3867<br>YPTB3868<br>YPTB3869<br>YPTB3870<br>YPTB3871<br>YPTB3872<br>YPTB3873<br>YPTB3874<br>YPTB3877<br>YPTB3878<br>YPTB3879<br>YPTB3880<br>YPTB3881<br>YPTB3882<br>YPTB3883<br>YPTB3884<br>YPTB3885                                                                                                                                                 | complement(4615019..4615396)<br>complement(4615368..4615775)<br>complement(4616645..4617502)<br>complement(4617726..4618190)<br>complement(4618147..4618482)<br>complement(4618494..4618973)<br>complement(4619156..4619776)<br>complement(4619804..4620358)<br>complement(4620606..4621238)<br>complement(4621286..4621615)<br>4622244..4622864<br>complement(4623046..4623696)<br>complement(4625594..4625920)<br>complement(4626056..4626793)<br>complement(4626797..4630075)<br>complement(4630072..4631118)<br>complement(4631115..4632344)<br>complement(4632334..4633857)<br>complement(4633864..4634442)<br>4634660..4635574<br>complement(4635877..4636101)                                                                         | putative DNA-binding protein<br>conserved hypothetical protein<br>conserved hypothetical protein<br>conserved hypothetical protein<br>conserved hypothetical protein<br>conserved hypothetical protein<br>hypothetical<br>hypothetical<br>conserved hypothetical protein<br>putative IS100 transposase<br>conserved hypothetical protein<br>mrr restriction system protein<br>mrr restriction system protein<br>putative predicted metal-dependent hydrolase<br>possible type I restriction enzyme (restriction subunit)<br>conserved hypothetical protein<br>possible restriction modification enzyme<br>putative type I site-specific deoxyribonuclease I.IIdf chain h...<br>hypothetical<br>conserved hypothetical protein<br>putative (AJ250469) putative SinR-like protein [Clostri.                                                                                                                                                                                                                                                                                                                                                                                                                                                                                                    |        | other |
