# Supplementary material
Source: PubMed Central journal article supplement (PMC518763)
Supplement: pnas_101_38_13826__3.pdf [file pnas_101_38_13826__3.pdf]

|          |          |   |   |   |   |   |   |   |   |   |   |   |   |   |   |   |   |   |   |   |   |   |   |   |   |   |   |   |   |   |
|----------|----------|---|---|---|---|---|---|---|---|---|---|---|---|---|---|---|---|---|---|---|---|---|---|---|---|---|---|---|---|---|
|          | YPTB3153 | - | - | - | - | - | - | - | - | - | - | - | - | - | - | - | - | + | - | - | - | - | - | - | - | - | + | - |   |   |
|          | YPTB3157 | - | - | - | - | - | - | - | - | - | - | - | - | - | - | - | - | - | - | - | - | - | - | - | - | - | - | - | - |   |
|          | YPTB3161 | - | - | - | - | - | - | - | - | - | - | - | - | - | - | - | - | - | - | - | - | - | - | - | - | - | - | - | - |   |
| 27       | YPTB3274 | - | - | - | - | - | - | - | - | - | - | - | - | - | - | - | - | + | + | + | + | - | - | + | w | - | - | + | + |   |
|          | YPTB3276 | - | - | - | - | - | - | - | - | - | - | - | - | - | - | - | - | + | + | + | + | - | - | - | - | - | - | + | + |   |
| 29-other | YPTB3365 | - | - | - | - | - | - | - | - | - | - | - | - | - | - | - | - | + | - | + | + | w | - | - | + | w | + | w | - | + |
|          | YPTB3368 | - | - | - | - | + | w | - | - | - | - | - | - | - | - | - | - | + | + | + | + | + | + | + | + | + | + | + | + |   |
| 31       | YPTB3455 | - | - | - | - | - | - | - | - | - | - | - | - | - | - | - | - | + | - | + | + | - | - | - | - | - | - | - | - |   |
|          | YPTB3795 | - | - | - | - | - | - | - | - | - | - | - | - | - | - | - | - | + | + | + | + | + | - | - | - | - | - | - | - |   |
| 35       | YPTB3795 | - | - | - | - | - | - | - | - | - | - | - | - | - | - | - | - | + | + | + | + | + | - | - | + | w | + | - | + |   |
|          | YPTB3865 | - | - | - | + | w | - | - | - | - | - | - | - | - | - | - | - | + | - | + | - | - | + | + | - | - | - | - | - |   |
| 36-other | YPTB3871 | - | - | - | - | - | - | - | - | - | - | - | - | - | - | - | - | + | - | + | - | - | + | + | - | - | - | - | - |   |
|          | YPTB3878 | - | - | - | - | - | - | - | - | - | - | - | - | - | - | - | - | + | - | + | - | - | + | + | - | - | - | - | - |   |
|          | YPTB3880 | - | - | - | - | - | - | - | - | - | - | - | - | - | - | - | - | + | - | + | - | - | + | + | - | - | - | - | - |   |
|          | YPTB3885 | - | - | - | - | - | - | - | - | - | - | - | - | - | - | - | - | + | - | + | - | - | + | + | - | - | - | - | - |   |

|                      |                      |
|----------------------|----------------------|
| GGCCGATTTAAACAGATT   | CCATCGCAGACATATAGCCA |
| CCGTCCGGACTGTTATTT   | TTATCACCTCCCTGACGAG  |
| GTCGGTGATGTGATTGC    | AACCACTGCCATTGTGTGA  |
| CTTGGTTGCTACAGAACGG  | CACAAAAGACTGACGCCCTT |
| CTTGGTTGATGGTTCTGGGA | CCCAATGAGTCTTTCCT    |
| CCGGAAATGGCTATAAAGA  | TAAGTGAGGAATCGGGTG   |
| GTGGCGGTATTAACCGAAAA | GCAGGATCGCATGATAGA   |
| GTATGGTCGCTGGGATAAT  | CCCAACCTCCAGTITTTCA  |
| CAAGTTGGTGAAGTGGTG   | CCTTCAGCTGGAAGGACT   |
| GGGCACCTACCAGCTACAA  | GATTGTCAGGAACGGCTTA  |
| TATCGGCAGTGGTTTACA   | GTCACCTTCCTCCGATA    |
| GCCACTATTACCTGGGCAAA | TGGGATTCAGATCACCTC   |
| CGAGCACCTGATCAACATCT | GCTTGTCTGGATGGTTTGA  |
| TCTCGGGAAGCAGAAAGATT | ACCGTCTCCGTAACACGAT  |

Identified in this study as *Y. pestis*-specific genes  
 + : amplification of expected size  
 +w : weak amplification of expected size  
 - : no amplification  
 \* Regions possibly horizontally-acquired (phage or other origin) are indicated
