# Supplementary material
Source: PubMed Central journal article supplement (PMC518763)
Supplement: pnas_101_38_13826__4.pdf [file pnas_101_38_13826__4.pdf]

Table 5: Regions and genes (or domains of functional genes) specific to CO92 and KIM10+ when compared with IP32953

| Regions       | Gene                                    | Location                           | CO92 annotation                            | Product                                   | Gene                         | Location                     | KIM10+ annotation                         | Product                                      | Putative regions of lateral transfer |
|---------------|-----------------------------------------|------------------------------------|--------------------------------------------|-------------------------------------------|------------------------------|------------------------------|-------------------------------------------|----------------------------------------------|--------------------------------------|
| 1             | YPO0387                                 | 405049..405112                     |                                            | hypothetical protein                      | y3797                        | complement(4215478..4217544) |                                           | hypothetical                                 |                                      |
|               | YPO0388                                 | 405109..406425                     |                                            | conserved hypothetical protein            | y3796                        | complement(4214165..4215481) |                                           | hypothetical                                 |                                      |
|               | YPO0389                                 | 406492..406722                     |                                            | hypothetical protein                      | NC                           |                              |                                           |                                              |                                      |
|               | YPO0390                                 | 406669..407436                     |                                            | hypothetical protein                      | y3794                        | complement(4213154..4213621) |                                           | hypothetical                                 |                                      |
|               | YPO0391                                 | 407449..408874                     |                                            | modification methylase                    | y3792                        | complement(4211816..4213141) |                                           | putative methyltransferase                   |                                      |
|               | YPO0392                                 | 408824..409546                     |                                            | hypothetical protein                      | y3791                        | complement(4211044..4211766) |                                           | hypothetical                                 |                                      |
|               | YPO0393                                 | 409656..410891                     |                                            | hypothetical protein                      | y3790                        | complement(4209699..4211072) |                                           | hypothetical                                 |                                      |
|               | YPO0394                                 | complement(411235..411522)         |                                            | hypothetical protein                      | y3789                        | 4209068..4209355             |                                           | hypothetical                                 |                                      |
|               | YPO0396                                 | 412139..413551                     |                                            | hypothetical protein                      | y3786                        | complement(4207039..4208427) |                                           | hypothetical                                 |                                      |
|               | YPO0397                                 | 413548..414702                     |                                            | hypothetical protein                      | y3785                        | complement(4205888..4207042) |                                           | hypothetical                                 |                                      |
|               | YPO0523                                 | 567541..567825                     |                                            | putative membrane protein                 | NC                           |                              |                                           |                                              |                                      |
|               | 3                                       | YPO1087                            | 1234752..1235063                           |                                           | putative prophage protein    | NC                           |                                           |                                              |                                      |
| YPO1088       |                                         | 1235071..1235391                   |                                            | putative DNA-binding prophage protein     | y3089                        | complement(3399434..3399754) |                                           | hypothetical                                 |                                      |
| YPO1089       |                                         | complement(1235740..1236828)       |                                            | putative regulatory prophage protein      | y3088                        | 3397991..3399085             |                                           | hypothetical                                 |                                      |
| YPO1090       |                                         | complement(1236825..1237784)       |                                            | putative prophage DNA primase             | y3087                        | 3397011..3398000             |                                           | hypothetical                                 |                                      |
| YPO1091       |                                         | complement(1237777..1238319)       |                                            | putative prophage protein                 | y3086                        | 3396506..3397048             |                                           | hypothetical                                 |                                      |
| YPO1092       |                                         | complement(1238512..1239408)       |                                            | putative DNA-binding prophage protein     | y3085                        | 3395417..3396313             |                                           | hypothetical                                 |                                      |
| YPO1092a      |                                         | complement(1239421..1239711)       |                                            | hypothetical protein                      | y3084                        | 3395114..3395404             |                                           | hypothetical                                 | phage                                |
| YPO1094       |                                         | complement(1239803..1239976)       |                                            | hypothetical protein                      | y3083                        | 3392560..3394050             |                                           | hypothetical                                 |                                      |
| YPO1095       |                                         | 1240207..1240434                   |                                            | hypothetical protein                      | NC                           |                              |                                           |                                              |                                      |
| YPO1096       |                                         | complement(1240596..1242266)       |                                            | putative phage protein                    | y3083                        | 3392560..3394050             |                                           | hypothetical                                 |                                      |
| YPO1097       | complement(1242317..1243405)            |                                    | putative phage protein                     | y3082                                     | 3391421..3392509             |                              | hypothetical                              |                                              |                                      |
| YPO1098       | complement(1243484..1244683)            |                                    | putative prophage integrase                | y3081                                     | 3390110..3391342             |                              | prophage CP4-57 integrase                 |                                              |                                      |
| 4             | YPO1252                                 | 1409403..1410182                   |                                            | putative bacteriophage tail fiber protein | y2934                        | complement(3237524..3238303) |                                           | hypothetical                                 | phage                                |
|               | YPO1257                                 | complement(1414135..1414623)       |                                            | hypothetical protein                      | y2929                        | 3233073..3233571             |                                           | hypothetical                                 |                                      |
| 5             | YPO1258                                 | complement(1414636..1415784)       |                                            | conserved hypothetical protein            | y2928                        | 3231922..3233070             |                                           | hypothetical                                 |                                      |
|               | YPO1473                                 | 1668162..1670462                   |                                            | hypothetical protein                      | y2697                        | complement(2977173..2979473) |                                           | hypothetical                                 |                                      |
| 6             | YPO1474                                 | 1670459..1671232                   |                                            | putative exported protein                 | y2696                        | complement(2976403..2977176) |                                           | hypothetical                                 |                                      |
|               | YPO1475                                 | 1671386..1671646                   |                                            | hypothetical protein                      | y2695                        | complement(2975989..2976249) |                                           | hypothetical                                 | other                                |
|               | YPO1476                                 | 1671662..1673845                   |                                            | hypothetical protein                      | y2694                        | complement(2973790..2975952) |                                           | hypothetical                                 |                                      |
|               | YPO1477                                 | 1674018..1674488                   |                                            | hypothetical protein                      | y2692                        | complement(2973147..2973617) |                                           | hypothetical                                 |                                      |
|               | YPO1480                                 | complement(1674956..1675823)       |                                            | transposase (partial)                     | y2690                        | 2972094..2972414             |                                           | putative transposase                         |                                      |
|               | YPO1668                                 | complement(1898862..1900097)       |                                            | putative membrane protein                 | y1829                        | complement(2014178..2015413) |                                           | putative resistance protein, transport       |                                      |
| 7             | YPO1669                                 | complement(1900110..1900487)       |                                            | YjgF-family lipoprotein                   | y1830                        | complement(2015426..2015833) |                                           | hypothetical protein                         |                                      |
|               | YPO1670                                 | complement(1900484..1901470)       |                                            | conserved hypothetical protein            | y1831                        | complement(2015800..2016786) |                                           | hypothetical                                 |                                      |
|               | YPO1671                                 | 1901648..1902325                   |                                            | putative DNA-binding protein              | y1832                        | 2016964..2017641             |                                           | hypothetical                                 |                                      |
|               | YPO1672                                 | 1902800..1906606                   |                                            | conserved hypothetical protein            | y1834                        | 2018786..2021923             |                                           | hypothetical                                 |                                      |
| 8             | YPO1817                                 | complement(2064772..2065191)       |                                            | conserved hypothetical protein            | y2490                        | 2751668..2752087             |                                           | hypothetical                                 |                                      |
|               | YPO1818                                 | complement(2065236..2065604)       |                                            | conserved hypothetical protein            | y2489                        | 2751255..2751623             |                                           | hypothetical                                 |                                      |
| 9             | YPO2006                                 | 2279186..2279722                   |                                            | hypothetical protein                      | y2302                        | complement(2537129..2537785) |                                           | hypothetical                                 |                                      |
|               | YPO2007                                 | 2279719..2280549                   |                                            | putative esterase                         | y2301                        | complement(2536970..2537123) |                                           | hypothetical                                 |                                      |
|               | YPO2008                                 | 2280557..2280955                   |                                            | putative rhodanese-like protein           | y2300                        | complement(2535896..2536348) |                                           | hypothetical                                 |                                      |
|               | YPO2009                                 | complement(2281003..2281512)       |                                            | putative integrase core domain protein    | y2299                        | 2535339..2535848             |                                           | putative recombinase                         |                                      |
|               | YPO2009a                                | complement(2281533..2281844)       |                                            | conserved hypothetical protein            | NC                           |                              |                                           |                                              |                                      |
|               | YPO2084                                 | join(complement(2363019..2364233)) |                                            | putative phage integrase (pseudogene)     | y2227                        | 2455229..2456467             |                                           | putative transposase                         |                                      |
|               | YPO2087                                 | complement(2366293..2366553)       |                                            | putative phage excisionase                | NC                           |                              |                                           |                                              |                                      |
|               | YPO2087a                                | complement(2366634..2366834)       |                                            | putative phage protein                    | NC                           |                              |                                           |                                              |                                      |
|               | YPO2088                                 | complement(2366853..2367497)       |                                            | putative methyltransferase                | y2224                        | 2451986..2452630             |                                           | putative DNA methyltransferase               |                                      |
|               | YPO2089                                 | 2367596..2368024                   |                                            | putative phage protein                    | y2223                        | complement(2451459..2451905) |                                           | putative phage nin-region protein            |                                      |
|               | YPO2090                                 | 2368098..2368416                   |                                            | putative phage protein                    | y2222                        | complement(2450780..2451385) |                                           | putative phage nin-G-like protein            |                                      |
|               | YPO2091                                 | 2368740..2369093                   |                                            | putative phage antitermination protein    | y2220                        | complement(2450590..2450779) |                                           | hypothetical protein                         |                                      |
| YPO2092       | 2369097..2369315                        |                                    | hypothetical phage protein                 | y2219                                     | complement(2450268..2450393) |                              | hypothetical                              |                                              |                                      |
| YPO2093       | 2369364..2369927                        |                                    | putative phage protein                     | y2218                                     | complement(2449556..2450119) |                              | putative phage protein                    |                                              |                                      |
| YPO2094       | complement(2370012..2370194)            |                                    | hypothetical phage protein                 | NC                                        |                              |                              |                                           |                                              |                                      |
| YPO2095       | 2370351..2370560                        |                                    | hypothetical phage protein                 | y2217                                     | complement(2448923..2449132) |                              | hypothetical                              |                                              |                                      |
| YPO2096       | complement(2370557..2370832)            |                                    | hypothetical phage protein                 | NC                                        |                              |                              |                                           |                                              |                                      |
| YPO2097       | 2370955..2371275                        |                                    | putative phage protein                     | NC                                        |                              |                              |                                           |                                              |                                      |
| YPO2098       | 2371306..2371818                        |                                    | putative phage lysozyme                    | y2216                                     | complement(2447665..2447820) |                              | hypothetical                              | phage endopeptidase Rz                       |                                      |
| YPO2099       | 2371803..2372261                        |                                    | putative prophage endonuclease             | y2215                                     | complement(2447222..2447680) |                              | putative phage antirepressor              |                                              |                                      |
| YPO2100       | 2372723..2373620                        |                                    | phage regulatory protein                   | y2214                                     | complement(2445967..2446700) |                              | putative phage antirepressor              |                                              |                                      |
| YPO2101       | 2373977..2374612                        |                                    | hypothetical phage protein                 | y2213                                     | complement(2444871..2445506) |                              | hypothetical                              |                                              |                                      |
| YPO2102       | 2374643..2375092                        |                                    | hypothetical phage protein                 | y2212                                     | complement(2444391..2444640) |                              | hypothetical                              |                                              |                                      |
| YPO2103       | join(2375102..2375656,2376971..2377915) |                                    | putative phage terminase (pseudogene)      | y2211                                     |                              |                              |                                           |                                              |                                      |
| YPO2106       | join(2377915..2378640,2378644..2379300) |                                    | putative phage protein (pseudogene)        | y2209                                     | complement(2440840..2441568) |                              | hypothetical                              |                                              |                                      |
| YPO2108       | 2379304..2380416                        |                                    | hypothetical phage protein                 | y2207                                     | complement(2439067..2440179) |                              | hypothetical                              |                                              |                                      |
| YPO2109       | 2380388..2381311                        |                                    | hypothetical phage protein                 | y2206                                     | complement(2438172..2439458) |                              | hypothetical                              |                                              |                                      |
| YPO2110       | 2381325..2382530                        |                                    | putative phage protein                     | y2205                                     | complement(2436953..2438158) |                              | hypothetical                              |                                              |                                      |
| YPO2111       | 2382530..2383060                        |                                    | hypothetical phage protein                 | y2204                                     | complement(2436423..2436980) |                              | hypothetical                              | phage                                        |                                      |
| YPO2112       | 2383057..2383311                        |                                    | conserved hypothetical phage protein       | y2203                                     | complement(2436172..2436426) |                              | hypothetical                              |                                              |                                      |
| YPO2113       | 2383313..2383663                        |                                    | hypothetical phage protein                 | y2202                                     | complement(2435820..2436170) |                              | hypothetical                              |                                              |                                      |
| YPO2114       | 2383665..2384249                        |                                    | hypothetical phage protein                 | y2201                                     | complement(2435234..2435818) |                              | hypothetical                              |                                              |                                      |
| YPO2115       | 2384246..2384653                        |                                    | hypothetical phage protein                 | y2200                                     | complement(2434830..2435237) |                              | hypothetical                              |                                              |                                      |
| YPO2116       | 2384719..2385639                        |                                    | putative phage protein                     | y2199                                     | complement(2433844..2434764) |                              | hypothetical                              |                                              |                                      |
| YPO2117       | 2385652..2385963                        |                                    | hypothetical phage protein                 | y2198                                     | complement(2433520..2433831) |                              | hypothetical                              |                                              |                                      |
| YPO2118       | 2386020..2386271                        |                                    | hypothetical phage protein                 | NC                                        |                              |                              |                                           |                                              |                                      |
| YPO2119       | 2386272..2389775                        |                                    | putative phage tail protein                | y2197                                     | complement(2429708..2433211) |                              | putative tail length tape measure protein |                                              |                                      |
| YPO2120       | 2389778..2390119                        |                                    | putative phage protein                     | y2196                                     | complement(2429564..2429705) |                              | putative phage tail protein               |                                              |                                      |
| YPO2122       | 2391003..2391755                        |                                    | putative phage protein                     | y2195                                     | complement(2428438..2429190) |                              | putative phage tail protein               |                                              |                                      |
| YPO2123       | 2391758..2392468                        |                                    | putative phage minor tail protein          | y2194                                     | complement(2427725..2428435) |                              | putative phage tail protein               |                                              |                                      |
| YPO2125       | complement(2393440..2393979)            |                                    | putative phage regulatory protein          | y2192                                     | 2426322..2426753             |                              | hypothetical                              |                                              |                                      |
| YPO2126       | 2394149..2395243                        |                                    | putative phage protein                     | y2191                                     | complement(2424950..2426044) |                              | putative phage antirepressor              |                                              |                                      |
| YPO2127       | 2395342..2395893                        |                                    | putative phage-related membrane protein    | y2190                                     | complement(2424300..2424851) |                              | hypothetical                              |                                              |                                      |
| YPO2128       | 2395901..2396251                        |                                    | putative phage-related lipoprotein         | NC                                        |                              |                              |                                           |                                              |                                      |
| YPO2129       | 2396307..2396927                        |                                    | putative phage tail assembly protein       | y2189                                     | complement(2423266..2423886) |                              | putative phage tail protein               |                                              |                                      |
| YPO2130       | complement(2397102..2397413)            |                                    | hypothetical phage protein                 | NC                                        |                              |                              |                                           |                                              |                                      |
| YPO2131       | 2397499..4400702                        |                                    | putative phage host specificity protein    | y2188                                     | complement(2419491..2422694) |                              | putative phage tail protein               |                                              |                                      |
| YPO2132       | 2400702..2401700                        |                                    | hypothetical phage protein                 | y2187                                     | complement(2418493..2419506) |                              | hypothetical                              |                                              |                                      |
| YPO2133       | 2401717..2402634                        |                                    | hypothetical phage protein                 | y2186                                     | complement(2417559..2418476) |                              | putative phage tail protein               |                                              |                                      |
| YPO2134       | 2402645..2403064                        |                                    | putative phage tail fiber assembly protein | y2185                                     | complement(2417129..2417548) |                              | putative phage tail protein               |                                              |                                      |
| YPO2135       | 2403061..2403216                        |                                    | hypothetical phage protein                 | NC                                        |                              |                              |                                           |                                              |                                      |
| YPO2261       | 2511331..2511933                        |                                    | hypothetical protein                       | y2103                                     | 2317222..2318321             |                              | hypothetical                              |                                              |                                      |
| YPO2466       | complement(2764300..2764554)            |                                    | hypothetical protein                       | NC                                        |                              |                              |                                           |                                              |                                      |
| 13            | YPO2483                                 | complement(2785296..2785700)       |                                            | hypothetical protein                      | y1703                        | 1886401..1886805             |                                           | hypothetical                                 |                                      |
|               | YPO2484                                 | complement(2785842..2786009)       |                                            | hypothetical protein                      | NC                           |                              |                                           |                                              |                                      |
|               | YPO2485                                 | complement(2786212..2786409)       |                                            | conserved hypothetical protein            | y1702                        | 1885692..1885889             |                                           | hypothetical                                 |                                      |
|               | YPO2486                                 | complement(2786419..2788452)       |                                            | conserved hypothetical protein            | y1701                        | 1883637..1885682             |                                           | putative hemagglutinin-like secreted protein |                                      |
| 14            | YPO2501                                 | complement(2813712..2814380)       |                                            | hypothetical protein                      | y1685                        | 1877326..1888458             |                                           | hypothetical                                 |                                      |
|               | YPO2574                                 | complement(2894374..2894928)       |                                            | putative membrane protein                 | y1144                        | complement(1290571..1291125) |                                           | hypothetical                                 |                                      |
| 16            | YPO3436                                 | complement(3838865..3839599)       |                                            | hypothetical protein (pseudogene)         | y0751                        | 838498..839619               |                                           | hypothetical                                 |                                      |
|               | YPO3437                                 | complement(3839952..3841862)       |                                            | conserved hypothetical protein            | y0750                        | 836505..838517               |                                           | hypothetical                                 |                                      |
| 17            | YPO3609                                 | 4023133..4024503                   |                                            | conserved hypothetical protein            | y0265                        | complement(278802..280172)   |                                           | rfsD protein                                 |                                      |
|               | YPO3610                                 | 4024505..4024990                   |                                            | conserved hypothetical protein            | y0264                        | complement(278315..278890)   |                                           | hypothetical                                 |                                      |
| 18            | YPO3616                                 | 4023596..4024390                   |                                            | conserved hypothetical protein            | y0254                        | complement(268916..269710)   |                                           | hypothetical                                 |                                      |
|               | YPO3945                                 | 4445294..4445668                   |                                            | hypothetical protein                      | y3883                        | complement(4323415..4323789) |                                           | hypothetical                                 |                                      |
| 19            | YPO3946                                 | complement(4445759..4446046)       |                                            | hypothetical protein                      | y3882                        | 4323037..4323324             |                                           | hypothetical                                 |                                      |
|               | YPO3947                                 | complement(4446053..4446427)       |                                            | hypothetical protein                      | y3881                        | 4322656..4323030             |                                           | hypothetical                                 |                                      |
|               | YPO3948                                 | complement(4446668..4446949)       |                                            | hypothetical protein                      | NC                           |                              |                                           |                                              |                                      |
| 20            | YPO4018                                 | 4533313..4534350                   |                                            | putative phosphatase-dependent protein    | y4039                        | 4480139..4481146             |                                           | cysteine synthase                            |                                      |
|               | YPO4028                                 | 4543227..4543589                   |                                            | putative regulator                        | y4049                        | 4490014..4490376             |                                           | hypothetical                                 |                                      |
|               | YPO4029                                 | 4543628..4544560                   |                                            | IS903 transposase (pseudogene)            | y4050                        | 4490548..4491054             |                                           | putative transposase                         |                                      |
|               | YPO4031                                 | 4544734..4544979                   |                                            | putative regulatory protein               | NC                           |                              |                                           |                                              | other                                |
|               | YPO4032                                 | complement(4545247..4546554)       |                                            | hypothetical protein                      | y4051                        | complement(4492034..4493506) |                                           | hypothetical                                 |                                      |
| *only in CO92 | YPO2271                                 | complement(2554373..2554636)       |                                            | phage hypothetical protein                | Absent                       |                              |                                           |                                              |                                      |
|               | YPO2272                                 | complement(2554638..               |                                            |                                           |                              |                              |                                           |                                              |                                      |
