# Supplementary material
Source: PubMed Central journal article supplement (PMC518763)
Supplement: pnas_101_38_13826__6.pdf [file pnas_101_38_13826__6.pdf]

Table 7: Pseudogenes in *Y. pseudotuberculosis* IP32953

| <i>Y. pseudotuberculosis</i><br>IP32953 gene | <i>Y. pestis</i> KIMI10+<br>gene | <i>Y. pestis</i> CO92<br>gene | Type of mutation     | Product                                                   |
|----------------------------------------------|----------------------------------|-------------------------------|----------------------|-----------------------------------------------------------|
| YPTB0014                                     | y3815                            | YPO0013                       | F/S                  | molybdopterin-guanine dinucleotide biosynthesis protein A |
| YPTB0146                                     | y0347                            | YPO3886                       | partial              | colicin                                                   |
| YPTB0148                                     | NC                               | YPO3884                       | partial              | colicin                                                   |
| YPTB0187                                     | absent                           | absent                        | IS285                | hypothetical                                              |
| YPTB0361                                     | y0564                            | YPO0304                       | F/S                  | putative resistance protein (transport)                   |
| YPTB0390                                     | y0595                            | YPO0336                       | partial              | insertion element protein                                 |
| YPTB0394                                     | NC                               | YPO0340                       | partial              | transposase                                               |
| YPTB0534                                     | y0749                            | YPO3438                       | stop                 | Integrase (intB)                                          |
| YPTB0665                                     | absent                           | absent                        | partial              | putative cytoplasmic protein                              |
| YPTB1018                                     | y1088                            | YPO3090                       | F/S                  | 5'-nucleotidase/UDP-sugar diphosphatase                   |
| YPTB1042                                     | NC                               | YPO2819                       | partial              | phage integrase                                           |
| YPTB1060                                     | NC                               | YPO2797                       | multiple             | hypothetical                                              |
| YPTB1129                                     | y1213                            | YPO2639                       | partial              | integrase                                                 |
| YPTB1131                                     | y1215                            | YPO2641                       | partial              | phage family integrase                                    |
| YPTB1134                                     | y3081                            | absent                        | partial              | putative prophage integrase                               |
| YPTB1271                                     | y2951                            | YPO1236                       | stop                 | putative class II aldolase-family protein                 |
| YPTB1295                                     | y2926                            | YPO1259                       | partial              | putative bacteriophage protein                            |
| YPTB1364                                     | y2847                            | YPO1334                       | inframe deletion     | putrescine transport system permease protein              |
| YPTB1466                                     | y2722                            | YPO1448                       | partial              | transposase                                               |
| YPTB1468                                     | y2719                            | YPO1449                       | multiple             | cytotoxic necrotizing factor                              |
| YPTB1602                                     | y2393                            | YPO1917                       | F/S                  | integrase                                                 |
| YPTB1707                                     | NC                               | YPO1833                       | F/S                  | conserved hypothetical                                    |
| YPTB1878                                     | y2439                            | YPO1869                       | partial              | phage replicative DNA helicase                            |
| YPTB1880                                     | y2440                            | YPO1868                       | F/S                  | putative transposase                                      |
| YPTB1893                                     | y2435                            | YPO1874                       | F/S                  | conserved hypothetical                                    |
| YPTB1894                                     | y2434                            | YPO1875                       | partial              | putative major tail sheath protein                        |
| YPTB1903                                     | y2426                            | YPO1883                       | IS285                | hypothetical protein                                      |
| YPTB1904                                     | y2425                            | YPO1884                       | F/S                  | transposase                                               |
| YPTB1908                                     | NC                               | YPO1888                       | partial              | putative transposase                                      |
| YPTB1909                                     | NC                               | YPO1889                       | partial              | putative transposase                                      |
| YPTB2201                                     | absent                           | absent                        | partial              | na <sup>+</sup> /H <sup>+</sup> antiporter                |
| YPTB2202                                     | y2113                            | YPO2283                       | insertion            | putative LacI-family transcriptional regulator            |
| YPTB2384                                     | y1859                            | YPO1697                       | F/S                  | pili assembly chaperone protein                           |
| YPTB2408                                     | y1822                            | YPO1663                       | F/S                  | flagellin biosynthesis txn reg.                           |
| YPTB2495                                     | absent                           | absent                        | deletions            | glucans biosynthesis protein                              |
| YPTB2524                                     | y1701                            | YPO2486                       | partial              | hemagglutinin-like secreted protein                       |
| YPTB2730                                     | y1471                            | YPO3010                       | stop                 | hypothetical                                              |
| YPTB2748                                     | y1452                            | YPO3031                       | partial              | putative acetyltransferase                                |
| YPTB2752                                     | absent                           | absent                        | multiple             | integrase                                                 |
| YPTB2930                                     | y1252                            | YPO2679                       | F/S                  | PTS system, cellobiose-specific IIC component             |
| YPTB3040                                     | y3179                            | NC                            | partial              | Conserved hypothetical protein                            |
| YPTB3096                                     | y3236                            | YPO0851                       | partial              | PTS transport protein                                     |
| YPTB3127                                     | y3268                            | YPO0886                       | partial              | insertion sequence protein                                |
| YPTB3128                                     | y3270                            | NC                            | partial              | putative prophage protein                                 |
| YPTB3178                                     | y3288                            | YPO0902                       | F/S                  | Putative surface protein                                  |
| YPTB3233                                     | NC                               | YPO0961                       | partial              | integrase                                                 |
| YPTB3234                                     | y3349                            | YPO0962                       | partial              | conserved hypothetical                                    |
| YPTB3240                                     | y3356                            | YPO0967A                      | partial              | insertion sequence protein                                |
| YPTB3253                                     | NC                               | YPO0979                       | partial              | insertion element protein                                 |
| YPTB3254                                     | NC                               | YPO0980A                      | partial              | insertion element protein                                 |
| YPTB3359                                     | y3476                            | YPO0702                       | stop                 | putative exported protein                                 |
| YPTB3367                                     | absent                           | absent                        | partial              | transposase                                               |
| YPTB3423                                     | y3545                            | YPO0632                       | F/S                  | hypothetical protein                                      |
| YPTB3450                                     | y3575                            | YPO0603                       | partial              | putative hemagglutinin/hemolysin-related protein          |
| YPTB3540                                     | y0170                            | YPO3693                       | promoter deletion    | Conserved hypothetical protein                            |
| YPTB3651                                     | y0022                            | YPO3720                       | F/S                  | hemolysin activator protein                               |
| YPTB3853                                     | y4039                            | YPO4018                       | partial              | pyridoxal-phosphate dependent protein                     |
| YPTB3854                                     | y4040                            | YPO4019                       | start codon mutation | putative phosphoribosyl transferase protein               |
| YPTB3861                                     | y4047                            | YPO4026                       | partial              | phage hypothetical protein                                |
| YPTB3874 and YPTB3877                        | absent                           | absent                        | IS100                | mrr restriction system protein, pseudogene                |
| YPTB3927                                     | y4078                            | YPO4058                       | stop                 | formate dehydrogenase-O, major subunit                    |
| YPTB3933                                     | y4071                            | YPO4051                       | partial              | transposase                                               |

NC = present but not called

F/S = frameshift

not a pseudogene

a pseudogene or absent from the genome

a pseudogene but previously called as a functional; or missed in the annotation
