# Supplementary material
Source: PubMed Central journal article supplement (PMC518763)
Supplement: pnas_101_38_13826__7.pdf [file pnas_101_38_13826__7.pdf]

Table 8a: List of new putative *Y. pestis* CO92 pseudogenes

| <i>Y. pseudotuberculosis</i><br>IP32953 gene | <i>Y. pestis</i> KIM10+ gene | <i>Y. pestis</i> CO92 gene | Type of mutation       | Product                                                                                  |
|----------------------------------------------|------------------------------|----------------------------|------------------------|------------------------------------------------------------------------------------------|
| YPTB0039                                     | y0099                        | YPO0042                    | F/S                    | putative membrane protein                                                                |
| YPTB0142                                     | y0343                        | YPO3891 and YPO3892        | F/S                    | conserved hypothetical protein                                                           |
| YPTB0188                                     | y0383                        | YPO3847                    | F/S                    | frataxin-like protein                                                                    |
| YPTB0195                                     | y0390                        | YPO3840                    | insertion              | putative TetR-family regulatory protein                                                  |
| YPTB0196                                     | y0391                        | YPO3839                    | inframe insertion      | conserved hypothetical protein                                                           |
| YPTB0207                                     | y0402                        | YPO3828                    | F/S                    | hypothetical                                                                             |
| YPTB0221                                     | y0416                        | YPO3814                    | inframe deletion       | cell division protein                                                                    |
| YPTB0243                                     | y0439                        | YPO3791                    | F/S                    | putative membrane protein                                                                |
| YPTB0275                                     | y0474                        | YPO3757                    | IS100 in promoter*     | putative acetyltransferase                                                               |
| YPTB0315                                     | y0517                        | YPO0260                    | F/S                    | putative AraC-family regulatory protein                                                  |
| YPTB0341                                     | y0544                        | NC                         | F/S                    | HEMIN UPTAKE PROTEIN HEMP                                                                |
| YPTB0362                                     | y0565                        | YPO0306                    | F/S                    | conserved hypothetical protein                                                           |
| YPTB0365                                     | y0567                        | YPO0309                    | inframe insertion      | ATP-binding component of transferase system                                              |
| YPTB0368                                     | y0570                        | YPO0312                    | inframe deletion       | glycerol-3-phosphate acyltransferase                                                     |
| YPTB0389                                     | y0594                        | YPO0335                    | inframe deletion       | hypothetical protein                                                                     |
| YPTB0427                                     | y0633                        | YPO0375                    | inframe deletion       | putative membrane protein                                                                |
| YPTB0453                                     | y0661                        | YPO3523                    | inframe deletion       | putative exported protein <i>YjFN</i>                                                    |
| YPTB0480                                     | y0688                        | YPO3496                    | inframe deletion       | translation initiation factor IF2-2                                                      |
| YPTB0545                                     | y3776                        | YPO0405                    | inframe insertion      | General PTS family, enzyme I, phosphohistidine domain                                    |
| YPTB0630                                     | NC                           | YPO0488                    | F/S                    | hypothetical protein                                                                     |
| YPTB0649                                     | y3665                        | YPO0508 and YPO0509        | stop                   | Conserved hypothetical protein                                                           |
| YPTB0656                                     | y3658                        | YPO0515                    | F/S                    | putative membrane protein                                                                |
| YPTB0672                                     | y3645                        | YPO0533                    | IS1541 in promoter*    | 2-isopropylmalate synthase                                                               |
| YPTB0714                                     | y0768                        | YPO3418                    | inframe deletion       | pyruvate dehydrogenase, dihydrolipoyltransacetylase component                            |
| YPTB0733                                     | y0789                        | YPO3398                    | inframe deletion       | putative glutamyl t-RNA synthetase                                                       |
| YPTB0735                                     | y0792                        | YPO3396                    | deletion               | sugar fermentation stimulation protein; transcriptional regulator for maltose metabolism |
| YPTB0750                                     | y0808                        | YPO3381                    | inframe deletion       | bifunctional multimodular BarA: sensory histidine kinase, activates OmpR                 |
| YPTB0756                                     | y0815                        | YPO3375                    | insertion              | superoxide dismutase precursor (Cu-Zn)                                                   |
| YPTB0759                                     | y0818                        | YPO3372                    | deletion               | sulfite reductase, beta (flavo)protein subunit                                           |
| YPTB0801                                     | y0859                        | YPO3330                    | IS1541 in promoter*    | putative sugar ABC transporter                                                           |
| YPTB0815                                     | y0874                        | YPO3315                    | inframe insertion      | putative sugar ABC transporter, permease protein                                         |
| YPTB0824                                     | y0882                        | YPO3306                    | Promoter deletion*     | putative regulatory protein                                                              |
| YPTB0871                                     | y0939                        | YPO3249                    | inframe insertion      | putative N-carbamyl-L-amino acid amidohydrolase                                          |
| YPTB0880                                     | y0942 and y0943              | YPO3247                    | F/S and deletion       | putative adhesin; involved in the adherence of host cells                                |
| YPTB0932                                     | y0997 and y0998              | YPO3186 and YPO3185        | F/S                    | Conserved hypothetical protein; putative membrane protein                                |
| YPTB0977                                     | y1045                        | YPO3139                    | inframe deletion       | putative 6-O-methylguanine DNA methyltransferase family protein                          |
| YPTB1051                                     | y1123                        | YPO2807                    | IS100 in promoter*     | LysR-family transcriptional regulator                                                    |
| YPTB1064                                     | y1136                        | YPO2793                    | Mutation of STOP codon | putative membrane protein                                                                |
| YPTB1066                                     | y1139                        | YPO2788                    | F/S                    | hypothetical                                                                             |
| YPTB1087                                     | y1165                        | YPO2594                    | F/S                    | hypothetical                                                                             |
| YPTB1121                                     | y1205                        | YPO2630                    | IS1541 in promoter*    | glutamyl-tRNA synthetase                                                                 |
| YPTB1181                                     | y3032                        | YPO1150                    | inframe deletion       | adenosylmethionine-8-amino-7-oxononanoate aminotransferase                               |
| YPTB1198                                     | absent                       | YPO1168                    | inframe deletion       | high-affinity choline transport protein                                                  |
| YPTB1256                                     | y2972                        | YPO1216                    | inframe deletion       | DNA gyrase subunit A                                                                     |
| YPTB1271                                     | y2951                        | YPO1236                    | partial deletion       | putative class II aldolase-family protein                                                |
| YPTB1286                                     | y2935 and y2936              | YPO1250a and YPO1251       | F/S                    | putative bacteriophage protein                                                           |
| YPTB1308                                     | y2909                        | YPO1274                    | F/S                    | putative membrane protein with Diguanylate cyclase/ phosphodiesterase domain 2           |
| YPTB1346                                     | y2870                        | YPO1315                    | stop                   | putative hydrolase                                                                       |
| YPTB1370                                     | y2839 and y2840              | YPO1344                    | F/S                    | FecCD transport family protein                                                           |
| YPTB1401                                     | y2800                        | YPO1376                    | inframe deletion       | putative cell division protein                                                           |
| YPTB1422                                     | y2775                        | YPO1397                    | inframe deletion       | conserved hypothetical protein                                                           |
| YPTB1446                                     | y2746                        | YPO1422                    | inframe deletion       | putative lipoprotein protein                                                             |
| YPTB1458                                     | y2730                        | YPO1440                    | inframe deletion       | putative helicase IV                                                                     |
| YPTB1533                                     | y2650                        | YPO1518                    | F/S                    | putative membrane protein                                                                |
| YPTB1565                                     | y2616                        | YPO1552                    | F/S                    | putative exported protein                                                                |
| YPTB1590                                     | y2405 and y2406              | YPO1905a and YPO1905       | F/S                    | hypothetical protein                                                                     |
| YPTB1635                                     | y2549                        | YPO1759                    | F/S                    | putative membrane protein                                                                |
| YPTB1639                                     | y2546                        | YPO1763                    | inframe deletion       | 5-carboxymethyl-2-hydroxymuconate semialdehyde dehydrogenase                             |
| YPTB1676                                     | y2506                        | YPO1803                    | partial deletion       | flagellar basal-body rod protein FlgF                                                    |
| YPTB1677                                     | y2505                        | YPO1804                    | partial deletion       | flagellar basal-body rod protein FlgG                                                    |
| YPTB1700                                     | y2479                        | YPO1827                    | F/S                    | flagellum-specific ATP synthase                                                          |
| YPTB1721                                     | y2457                        | YPO1849                    | F/S                    | conserved hypothetical                                                                   |
| YPTB1880                                     | y2440                        | YPO1868                    | F/S                    | putative transposase                                                                     |
| YPTB1916                                     | y2413 and y2414              | YPO1896                    | F/S                    | putative binding-protein                                                                 |
| YPTB1920                                     | y2389                        | YPO1921                    | inframe deletion       | probable pili assembly chaperone                                                         |
| YPTB1980                                     | y2324                        | YPO1987                    | IS285                  | hypothetical protein                                                                     |
| YPTB2024 and YPTB2025                        | y2270                        | YPO2042                    | fusion                 | conserved hypothetical AND virulence factor                                              |
| YPTB2028                                     | y2267                        | YPO2045                    | F/S                    | putative hemolysin                                                                       |
| YPTB2075                                     | y2173                        | YPO2148                    | inframe insertion      | multidrug resistance protein                                                             |
| YPTB2101                                     | y2146                        | YPO2175                    | inframe insertion      | Hns DNA binding protein                                                                  |
| YPTB2115                                     | NC                           | NC                         | F/S                    | conserved hypothetical                                                                   |
| YPTB2117                                     | y2037                        | YPO2193                    | inframe insertion      | TonB                                                                                     |
| YPTB2165                                     | y2085                        | YPO2244                    | F/S                    | Fe-S binding NADH dehydrog.                                                              |
| YPTB2166                                     | y2086                        | YPO2245                    | stop                   | Fe-S ferredoxin protein                                                                  |
| YPTB2188                                     | y2108                        | YPO2266                    | stop                   | multidrug R permease                                                                     |
| YPTB2210                                     | y2118                        | NC                         | partial deletion       | putative taurine transport system ATP-binding                                            |
| YPTB2211                                     | y2119                        | YPO2288                    | deletion and F/S       | ann = AMP nucleosidase                                                                   |
| YPTB2212                                     | y2121                        | YPO2289                    | inframe deletion       | SrIA putative virulence factor in Salmonella                                             |
| YPTB2213                                     | y2122                        | YPO2290                    | inframe insertion      | SrIB putative virulence factor in Salmonella                                             |
| YPTB2217                                     | y2127                        | YPO2294                    | deletion               | ikN = acetolactate synthase                                                              |
| YPTB2219                                     | y2129                        | YPO2296 and YPO2297        | F/S                    | putative membrane protein                                                                |
| YPTB2231                                     | y2140                        | YPO2309                    | F/S                    | two-component reg. system                                                                |
| YPTB2233                                     | y2020 and y2019              | YPO2312 and YPO2313        | F/S                    | insecticidal toxin TccC                                                                  |
| YPTB2294                                     | absent                       | YPO2380                    | inframe insertion      | insecticidal toxin                                                                       |
| YPTB2403                                     | y1835                        | YPO1673                    | inframe insertion      | membrane protein                                                                         |
| YPTB2406                                     | y1826                        | YPO1665                    | inframe deletion       | motB chemotaxis                                                                          |
| YPTB2415                                     | y1817                        | YPO1654                    | inframe deletion       | LacZ                                                                                     |
| YPTB2439                                     | y1788 and y1789              | YPO1629                    | F/S                    | NAGC-like txn regulator                                                                  |
| YPTB2446                                     | y1779                        | YPO1619                    | stop                   | hypothetical                                                                             |
| YPTB2486                                     | y1741                        | YPO2449                    | inframe insertion      | LuxR-like transcriptional regulator                                                      |
| YPTB2498                                     | y1734                        | YPO2455                    | partial deletion       | permease                                                                                 |
| YPTB2508                                     | y1724                        | YPO2465                    | partial deletion       | conserved hypothetical                                                                   |
| YPTB2527                                     | y1697                        | YPO2490                    | inframe deletion       | putative hemolysin                                                                       |
| YPTB2531                                     | y1693                        | YPO2494                    | inframe insertion      | BCCT-family transporter                                                                  |
| YPTB2540                                     | y1684                        | YPO2504                    | partial deletion       | hypothetical protein                                                                     |
| YPTB2551                                     | y1672                        | YPO2515                    | IS100 insertion        | putative chemotactic transducer                                                          |
| YPTB2591                                     | NC                           | YPO2560                    | partial deletion       | putative exported protein                                                                |
| YPTB2604                                     | y1613                        | YPO2780                    | F/S                    | conserved hypothetical                                                                   |
| YPTB2659                                     | y1555                        | YPO2725                    | F/S                    | conserved hypothetical                                                                   |
| YPTB2661                                     | y1552                        | YPO2723                    | IS100 insertion        | possible OmpA family                                                                     |
| YPTB2731                                     | y1470                        | YPO3011                    | F/S                    | cysteine synthase B                                                                      |
| YPTB2778                                     | y1424                        | YPO3056                    | F/S                    | putative acetyltransferase                                                               |
| YPTB2781                                     | y1421                        | YPO3059                    | IS1541 in promoter*    | phosphoribosylaminoimidazole-succinocarboxamide synthase                                 |
| YPTB2823                                     | y1375 and y1374              | YPO2858                    | F/S                    | hypothetical protein                                                                     |
| YPTB2826                                     | y1370                        | YPO2863                    | IS285                  | putative membrane protein                                                                |
| YPTB2842                                     | y1352                        | YPO2880                    | inframe deletion       | putative DNA-binding protein                                                             |

|          |                 |                                 |                         |                                                                                                      |
|----------|-----------------|---------------------------------|-------------------------|------------------------------------------------------------------------------------------------------|
| YPTB2893 | y1294           | YPO2715                         | F/S                     | putative membrane protein                                                                            |
| YPTB3032 | NC              | YPO0782                         | F/S                     | Putative membrane protein                                                                            |
| YPTB3052 | y3191           | YPO0803                         | F/S                     | hypothetical protein                                                                                 |
| YPTB3053 | y3192           | YPO0804                         | F/S                     | Putative regulatory membrane protein                                                                 |
| YPTB3054 | y3194           | YPO0805                         | F/S                     | putative membrane protein                                                                            |
| YPTB3069 | y3208           | YPO0820                         | F/S                     | hypothetical protein                                                                                 |
| YPTB3104 | y3244           | YPO0859                         | F/S                     | Sugar ABC transporter system, permease.                                                              |
| YPTB3119 | y3258 and y3259 | YPO0876 and YPO0877             | F/S                     | No significant database hits.                                                                        |
| YPTB3219 | y3333           | YPO0947                         | inframe insertion       | hemolysin-like Ca binding domains, hits to RTX toxins and related Ca <sup>2+</sup> -binding proteins |
| YPTB3234 | y3349           | YPO0962                         | partial                 | conserved hypothetical                                                                               |
| YPTB3243 | y3359           | YPO0968a                        | F/S                     | hypothetical protein                                                                                 |
| YPTB3273 | y3433           | YPO0761                         | Mutation of START codon | hypothetical protein                                                                                 |
| YPTB3282 | y3432           | YPO0762                         | F/S                     | Conserved hypothetical protein.                                                                      |
| YPTB3296 | y3416           | YPO0776                         | insertion               | putative siderophore biosynthesis protein                                                            |
| YPTB3297 | y3410 and y3412 | YPO0777 and YPO0778 and YPO1012 | IS insertion            | Putative siderophore biosynthesis protein.                                                           |
| YPTB3308 | y3389           | YPO0999 and YPO0998             | stop                    | Conserved putative membrane protein                                                                  |
| YPTB3322 | absent          | YPO0743                         | inframe insertion       | flagellar hook-length control protein                                                                |
| YPTB3344 | y3460           | YPO0718                         | inframe deletion        | Conserved hypothetical protein                                                                       |
| YPTB3371 | y3483           | YPO0694                         | inframe deletion        | Putative membrane protein                                                                            |
| YPTB3397 | y3513           | YPO0666                         | F/S                     | Ice protein homologue                                                                                |
| YPTB3419 | y3539 and y3540 | YPO0641a and YPO0642            | F/S                     | hypothetical protein weakly homologous to the small subunit of phage terminases                      |
| YPTB3422 | y3543           | YPO0639                         | IS100 in promoter*      | hypothetical protein                                                                                 |
| YPTB3424 | y3547           | YPO0631                         | stop                    | LysR-family regulatory protein - unknown function.                                                   |
| YPTB3429 | NC              | YPO0626                         | F/S                     | Conserved hypothetical                                                                               |
| YPTB3465 | y3585           | YPO0594                         | F/S                     | Conserved hypothetical protein                                                                       |
| YPTB3512 | y0139           | YPO3568                         | IS1541 in promoter*     | Protase                                                                                              |
| YPTB3534 | y0164           | YPO3699                         | IS100 in promoter*      | putative exported protein                                                                            |
| YPTB3551 | y0183           | YPO3681                         | inframe insertion       | Insecticidal toxin TcaA                                                                              |
| YPTB3553 | y0185           | YPO3678                         | inframe insertion       | Insecticidal toxin TcaC                                                                              |
| YPTB3579 | y0216           | YPO3651                         | inframe deletion        | Transcriptional regulator                                                                            |
| YPTB3605 | y0245           | YPO3624                         | insertion               | aliphatic sulfonates binding protein                                                                 |
| YPTB3621 | y0265 and y0266 | YPO3608 and YPO3609             | stop                    | putative exported protein                                                                            |
| YPTB3624 | y0269           | YPO3604 and YPO3605             | F/S                     | Conserved hypothetical protein                                                                       |
| YPTB3655 | y0018           | YPO3724                         | Insertion in promoter*  | isocitrate dehydrogenase kinase/phosphatase                                                          |
| YPTB3712 | y3975           | YPO0193                         | inframe deletion        | peptidyl-prolyl-cis-trans isomerase                                                                  |
| YPTB3737 | y3948           | YPO0164                         | inframe insertion       | putative membrane receptor protein                                                                   |
| YPTB3743 | y3941           | YPO0158                         | inframe deletion        | siroheme synthase                                                                                    |
| YPTB3756 | NC              | NC                              | partial only            | putative (AJ306977) glutenin HMW subunit 1Ay                                                         |
| YPTB3785 | y3888           | YPO3940                         | F/S                     | glucose-1-phosphate adenylyltransferase                                                              |
| YPTB3789 | y3884           | YPO3944                         | inframe deletion        | possible Bacterial Ig-like domain (group 1). Putative invasin                                        |
| YPTB3795 | y3877           | YPO3952                         | deletion                | conserved hypothetical protein                                                                       |
| YPTB3827 | y3842           | YPO3987                         | F/S                     | putative exported protein                                                                            |
| YPTB3841 | y3826 and y3827 | YPO4002                         | F/S                     | dipeptide transport system permease protein                                                          |

\* Genes with promoter anomalies were designated pseudogenes if the IS element, insertion or deletion occurred within -50bp or the ATG start

Table 8b: List of pseudogenes originally called in CO92 (modified from Parkhill et al. 2001)

| <i>Y. pseudotuberculosis</i> | <i>Y. pestis</i> KIM10+ gene | <i>Y. pestis</i> CO92 gene | Type of mutation | Product                                                              |
|------------------------------|------------------------------|----------------------------|------------------|----------------------------------------------------------------------|
| not a gene                   | NC                           | YPO2366                    | IS100            | putative membrane protein                                            |
| absent                       | y3787                        | YPO0395                    | Partial          | transposase                                                          |
| absent                       | y3214                        | YPO0824A                   | IS100            | transposase                                                          |
| absent                       | NC                           | YPO1086a                   | Partial          | phage integrase                                                      |
| absent                       | y2690                        | YPO1480                    | Partial          | transposase                                                          |
| absent                       | y2211                        | YPO2103                    | IS285            | putative terminase                                                   |
| absent                       | y2209                        | YPO2106                    | F/S              | putative phage protein                                               |
| absent                       | absent                       | YPO3125                    | Fusion           | insertion sequence IS100, transposase and ATP-binding fusion protein |
| absent                       | y0751                        | YPO3436                    | IS100            | hypothetical protein                                                 |
| absent                       | IS1661                       | YPO3592A                   | IS100            | insertion element IS1661 protein (split from YPO3702 by inversion)   |
| absent                       | IS1661                       | YPO3702                    | IS100            | insertion element IS1661 protein (split from YPO3592A by inversion)  |
| absent                       | y4050                        | YPO4029                    | F/S              | IS903 transposase                                                    |
| YPTB0058                     | y0079                        | YPO0061                    | F/S              | hypothetical protein                                                 |
| YPTB0085                     | y0048                        | YPO0089                    | Partial          | GlpX protein                                                         |
| YPTB0086                     | y0047                        | YPO0090                    | Partial          | glycerol kinase                                                      |
| YPTB0090                     | y0286                        | YPO0098                    | IS100            | ABC-transport protein, ATP-binding component                         |
| YPTB0105                     | y0302                        | YPO0115                    | F/S (7G)         | cystathionine gamma-synthase                                         |
| YPTB0146                     | y0347                        | YPO3886                    | Partial          | colicin                                                              |
| YPTB0148                     | NC                           | YPO3884                    | Partial          | colicin                                                              |
| YPTB0164                     | y0358                        | YPO3870                    | F/S              | guanosine-5'-triphosphate,3'-diphosphate pyrophosphatase             |
| YPTB0261                     | y0455                        | YPO3775                    | IS100            | deoxyribonuclease TatD                                               |
| YPTB0269                     | y0467                        | YPO3763                    | IS1541           | conserved hypothetical protein                                       |
| YPTB0305                     | y0507                        | YPO0250                    | IS100            | putative hydrolase                                                   |
| YPTB0390                     | y0595                        | YPO0336                    | Partial          | insertion element protein                                            |
| YPTB0394                     | NC                           | YPO0340                    | Partial          | transposase                                                          |
| YPTB0436                     | y0644                        | YPO3541                    | IS100            | conserved hypothetical protein                                       |
| YPTB0524                     | y0738                        | YPO3448                    | F/S (7G)         | putative extracellular solute-binding protein                        |
| YPTB0553                     | y3765                        | YPO0414                    | F/S              | Putative transcriptional regulator                                   |
| YPTB0582                     | y3742                        | YPO0437                    | F/S              | thymidine phosphorylase                                              |
| YPTB0590                     | y3734                        | YPO0446                    | F/S              | ABC transporter ATP-binding protein                                  |
| YPTB0668                     | y3649                        | YPO0526                    | IS100            | sugar efflux transporter                                             |
| YPTB0761                     | y0820                        | YPO3370                    | F/S              | phosphoadenosine phosphosulfate reductase                            |
| YPTB0792                     | y0850                        | YPO3340                    | Stop codon       | putative exogenous ferric siderophore receptor                       |
| YPTB0839                     | y0900                        | YPO3288                    | F/S              | anaerobic C4-dicarboxylate transporter                               |
| YPTB0843                     | y0907                        | YPO3281                    | IS100            | P-protein [includes: chorismate mutase and prephenate dehydratase]   |
| YPTB0870                     | y0938                        | YPO3250                    | IS100            | putative transaminase                                                |
| YPTB0915                     | y0976                        | YPO3207                    | IS100            | exonuclease SbcC                                                     |
| YPTB0924                     | y0986                        | YPO3198                    | F/S (10G)        | Gamma-glutamyltranspeptidase precursor                               |
| YPTB0990                     | y1058                        | YPO3126                    | IS100            | putative exported protein                                            |
| YPTB1100                     | y1069                        | YPO3114                    | F/S (11C)        | CDP-D-glucose-4,6-dehydratase                                        |
| YPTB1105                     | y1075                        | YPO3108                    | F/S              | putative glycosyltransferase                                         |
| YPTB1107                     | y1077                        | YPO3105                    | F/S (9T)         | putative O-unit polymerase protein                                   |
| YPTB1109                     | y1079                        | YPO3102                    | F/S              | probable GDP-mannose 4,6-dehydratase                                 |
| YPTB1110                     | y1080                        | YPO3100                    | F/S (6G)         | GDP-L-fucose synthetase                                              |
| YPTB1118                     | y1088                        | YPO3090                    | F/S              | UDP-sugar hydrolase                                                  |
| YPTB1042                     | NC                           | YPO2819                    | Partial          | phage integrase                                                      |
| YPTB1059                     | y1133                        | YPO2798                    | IS285            | conserved hypothetical protein                                       |
| YPTB1068                     | y1141                        | YPO2572                    | IS285            | penicillin-binding protein 1C (split from YPO2784 by inversion)      |
| YPTB1068                     | y1141                        | YPO2784                    | IS285            | penicillin-binding protein 1C (split from YPO2572 by inversion)      |
| YPTB1073                     | y1148                        | YPO2579                    | F/S              | putative myo-inositol dehydrogenase                                  |
| YPTB1123                     | y1207                        | YPO2632                    | F/S              | N-acetylglucosaminidase                                              |
| YPTB1129                     | y1213                        | YPO2639                    | Partial          | integrase                                                            |
| YPTB1131                     | y1215                        | YPO2641                    | Partial          | phage family integrase                                               |
| YPTB1165                     | y3049                        | YPO1130                    | IS100            | phospho-2-dehydro-3-deoxyheptone aldolase, phe-sensitive             |
| YPTB1168                     | y3046                        | YPO1135                    | F/S (6G)         | aldose 1-epimerase                                                   |
| YPTB1202                     | absent                       | YPO1172                    | IS1541           | xanthosine permease                                                  |
| YPTB1236                     | y2994                        | YPO1195                    | Stop codon       | putative substrate-binding transport protein                         |
| YPTB1259                     | y2968                        | YPO1219                    | F/S (7T)         | putative two component sensor kinase                                 |
| YPTB1295                     | y2926                        | YPO1259                    | Partial          | putative bacteriophage protein                                       |
| YPTB1367                     | y2844                        | YPO1337                    | IS100            | arginine-binding periplasmic protein 2 precursor                     |
| YPTB1449                     | y2741                        | YPO1428                    | IS100            | 3-oxoacyl-(acyl-carrier-protein) synthase II                         |
| YPTB1466                     | y2722                        | YPO1448                    | Partial          | transposase                                                          |

|          |        |          |             |                                                                         |
|----------|--------|----------|-------------|-------------------------------------------------------------------------|
| YPTB1468 | y2719  | YPO1449  | Partial     | cytotoxic necrotizing factor                                            |
| YPTB1566 | y2614  | YPO1554  | F/S         | sugar transport ATP-binding protein                                     |
| YPTB1572 | y2605  | YPO1562  | IS285       | putative intimin                                                        |
| YPTB1609 | y2581  | YPO1582  | IS285       | lactose permease                                                        |
| YPTB1610 | y2579  | YPO1728  | IS100       | Putative transcriptional regulator of sugar transport                   |
| YPTB1628 | y2559  | YPO1752  | IS100       | hypothetical protein                                                    |
| YPTB1637 | y2547  | YPO1761  | F/S         | 4-hydroxyphenylacetate degradation bifunctional isomerase/decarboxylase |
| YPTB1668 | y2515  | YPO1793  | IS200-like  | invasin                                                                 |
| YPTB1709 | y2472  | YPO1835  | F/S         | putative chemotaxis protein                                             |
| YPTB1878 | y2439  | YPO1869  | Partial     | phage replicative DNA helicase                                          |
| YPTB1894 | y2434  | YPO1875  | Partial     | putative major tail sheath protein                                      |
| YPTB1903 | y2426  | YPO1883  | IS285       | hypothetical protein                                                    |
| YPTB1904 | y2425  | YPO1884  | F/S         | transposase                                                             |
| YPTB1908 | NC     | YPO1888  | Partial     | putative transposase                                                    |
| YPTB1909 | NC     | YPO1889  | Partial     | putative transposase                                                    |
| YPTB1922 | y2387  | YPO1923  | F/S         | Putative sensor protein                                                 |
| YPTB1964 | y2344  | YPO1967  | IS100       | porin                                                                   |
| YPTB1971 | y2335  | YPO1977  | F/S         | 3-oxoacyl-[acyl-carrier-protein] synthase III                           |
| YPTB2011 | y2285  | YPO2027  | IS100       | conserved hypothetical protein                                          |
| YPTB2016 | y2278  | YPO2034  | IS1541      | Putative ABC transporter ATP-binding protein                            |
| YPTB2097 | y2150  | YPO2171  | IS285       | formyltetrahydrofolate deformylase                                      |
| YPTB2120 | y2041  | YPO2197  | F/S         | putative integral membrane protein                                      |
| YPTB2169 | y2090  | YPO2249  | F/S         | putative toxin transport protein                                        |
| YPTB2170 | y2092  | YPO2250  | F/S         | putative toxin secretion protein                                        |
| YPTB2204 | y2115  | YPO2285  | Partial     | putative ribose-binding periplasmic protein                             |
| YPTB2308 | y1840  | YPO2398  | IS100       | Putative exported protein                                               |
| YPTB2321 | y1927  | YPO2412  | Stop codon  | Conserved hypothetical protein                                          |
| YPTB2355 | y1888  | YPO1726  | IS285       | pectin degradation protein                                              |
| YPTB2394 | y1846  | YPO1684  | F/S (9G)    | putative membrane protein                                               |
| YPTB2400 | y1838  | YPO1676  | Stop codon  | methyl-accepting chemotaxis protein                                     |
| YPTB2409 | NC     | YPO1662  | F/S         | Flagellar biosynthesis regulatory protein                               |
| YPTB2412 | y1819  | YPO1657  | F/S         | methyl-accepting chemotaxis protein                                     |
| YPTB2484 | NC     | YPO1584  | IS285       | conserved hypothetical protein                                          |
| YPTB2601 | y1617  | YPO2570  | IS285       | phosphotransferase enzyme II, B component                               |
| YPTB2661 | y1552  | YPO2933  | IS100       | hypothetical protein                                                    |
| YPTB2668 | y1543  | YPO2943  | IS285       | outer membrane usher protein                                            |
| YPTB2725 | y1477  | YPO3004  | F/S         | putative aminopeptidase                                                 |
| YPTB2740 | y1460  | YPO3021  | F/S (8C)    | putative outer membrane protein                                         |
| YPTB2798 | y1403  | YPO2831  | F/S (6A)    | putative flagellar associated lysine-N-methylase                        |
| YPTB2817 | y1382  | YPO2851  | F/S (7G)    | two-component system, sensor kinase                                     |
| YPTB2826 | y1370  | YPO2861  | IS285       | hypothetical protein                                                    |
| YPTB2849 | y1345  | YPO2887  | F/S         | putative autotransporter protein                                        |
| YPTB2871 | y1318  | YPO2909  | F/S (10A)   | conserved hypothetical protein                                          |
| YPTB2910 | y1273  | YPO2698  | Stop codon  | conserved hypothetical protein                                          |
| YPTB2938 | y1243  | YPO2671  | F/S (7G)    | urease accessory protein                                                |
| YPTB2951 | y1229  | YPO2657  | IS285       | putative mobilization protein                                           |
| YPTB2962 | y3092  | YPO1084  | IS100       | conserved hypothetical protein                                          |
| YPTB2962 | y1218  | YPO2644  | IS100       | conserved hypothetical protein                                          |
| YPTB3031 | y3170  | YPO0781  | IS100       | putative surface structure protein                                      |
| YPTB3063 | y3202  | YPO0814  | F/S         | general secretion pathway protein F                                     |
| YPTB3096 | y3236  | YPO0851  | Partial     | PIS transport protein                                                   |
| YPTB3127 | y3268  | YPO0886  | Partial     | insertion sequence protein                                              |
| YPTB3178 | y3288  | YPO0902  | Partial     | putative surface protein                                                |
| YPTB3220 | y3335  | YPO0948  | F/S (5A)    | conserved hypothetical protein                                          |
| YPTB3233 | NC     | YPO0961  | Partial     | integrase                                                               |
| YPTB3240 | y3356  | YPO0967A | Partial     | insertion sequence protein                                              |
| YPTB3253 | NC     | YPO0979  | Partial     | insertion element protein                                               |
| YPTB3254 | NC     | YPO0980A | Partial     | insertion element protein                                               |
| YPTB3263 | y3380  | YPO0989  | F/S         | putative siderophore biosynthesis protein IucA                          |
| YPTB3269 | y3438  | YPO0757  | IS1661      | hypothetical protein                                                    |
| YPTB3285 | y3429  | YPO0765  | F/S         | putative adhesin                                                        |
| YPTB3297 | y3406  | YPO1012  | IS100       | putative peptide/polyketide synthase subunit                            |
| YPTB3313 | absent | YPO0752  | F/S (9G)    | putative lipoprotein                                                    |
| YPTB3336 | y3451  | YPO0727  | IS100       | putative flagellar basal-body rod protein                               |
| YPTB3357 | y3473  | YPO0704  | F/S         | flagellar assembly protein                                              |
| YPTB3372 | y3484  | YPO0692  | F/S         | putative membrane protein                                               |
| YPTB3389 | y3503  | YPO0674  | F/S         | conserved hypothetical protein                                          |
| YPTB3423 | y3545  | YPO0632  | F/S         | hypothetical protein                                                    |
| YPTB3450 | y3575  | YPO0603  | Partial     | putative hemagglutinin/hemolysin-related protein                        |
| YPTB3489 | y0112  | YPO3544  | IS100       | conserved hypothetical protein                                          |
| YPTB3527 | y0155  | YPO3583  | Stop codon  | probable sigma (54) modulation protein                                  |
| YPTB3545 | y0176  | YPO3687  | F/S (6G)    | putative aldehyde dehydrogenase                                         |
| YPTB3552 | y0184  | YPO3679  | F/S (6A)    | insecticidal toxin complex protein TcaB                                 |
| YPTB3635 | y0281  | YPO3593  | Partial     | hypothetical protein                                                    |
| YPTB3635 | y0040  | YPO3704  | IS166       | conserved hypothetical protein                                          |
| YPTB3654 | y0019  | YPO3723  | F/S (5G+5C) | acetate operon repressor                                                |
| YPTB3659 | y4029  | YPO0247  | IS100       | putative transferase                                                    |
| YPTB3716 | y3970  | YPO0188  | F/S         | binding protein dependent ABC-transport protein                         |
| YPTB3731 | y3854  | YPO0170  | IS100       | acetylmethine aminotransferase                                          |
| YPTB3775 | y3901  | YPO0124  | F/S         | maltodextrin phosphorylase                                              |
| YPTB3782 | y3891  | YPO3937  | Partial     | Aerobic glycerol-3-phosphate dehydrogenase                              |
| YPTB3837 | y3831  | YPO3998  | F/S (7T)    | endoglucanase                                                           |
| YPTB3846 | y3820  | YPO4008  | IS100       | two-component system, sensor kinase                                     |
| YPTB3861 | y4047  | YPO4026  | Partial     | phage hypothetical protein                                              |
| YPTB3895 | y4062  | YPO4042  | F/S         | fimbrial usher protein                                                  |
| YPTB3902 | y4104  | YPO4087  | F/S         | conserved hypothetical protein                                          |
| YPTB3927 | y4078  | YPO4058  | Opal codon  | Formate dehydrogenase-O, major subunit                                  |
| YPTB3932 | y4073  | YPO4052  | F/S (10G)   | selenocysteine-specific elongation factor                               |
| YPTB3933 | y4071  | YPO4051  | Partial     | transposase                                                             |

F/S = frameshift

NC = present but not called

not a pseudogene

a pseudogene or absent from the genome

a pseudogene but previously called as a functional, or missed in the annotation
